# Supplementary material for: AXL/CDCP1/SRC axis confers acquired resistance to osimertinib in lung cancer
Source: PubMed Central journal article supplement (PMC9148303; doi:10.1038/s41598-022-12995-8), 2022-05-28

## Supplementary Information

### **AXL/CDCP1/SRC axis confers to acquired resistance to osimertinib in lung cancer**

Yuichi Murakami<sup>1,2</sup>, Daiki Kusakabe<sup>3</sup>, Kosuke Watari<sup>4</sup>, Akihiko Kawahara<sup>5</sup>, Koichi Azuma<sup>6</sup>, Jun Akiba<sup>5</sup>, Masahiko Taniguchi<sup>7</sup>, Michihiko Kuwano<sup>1</sup> and Mayumi Ono<sup>1,8\*</sup>

#### **Author affiliations**

<sup>1</sup>Cancer Translational Research Center, St. Mary's Institute of Health Sciences, Kurume, Fukuoka, Japan

<sup>2</sup>Department of Pharmaceutics, Graduate School of Pharmaceutical Sciences, Kyushu University, Fukuoka, Japan

<sup>3</sup>Physical Chemistry for Life Science Laboratory, Faculty of Pharmaceutical Sciences, Kyushu University, Fukuoka, Japan.

<sup>4</sup>Department of Pharmacology, School of Medicine, University of California, San Diego, La Jolla, CA, USA

<sup>5</sup>Department of Diagnostic Pathology, Kurume University Hospital, Kurume, Fukuoka, Japan.

<sup>6</sup>Division of Respiriology, Neurology and Rheumatology, Department of Internal Medicine, Kurume University School of Medicine, Kurume, Fukuoka, Japan

<sup>7</sup>Department of Surgery, St. Mary's Hospital, Kurume, Fukuoka, Japan

<sup>8</sup>Department of Pharmaceutical Oncology, Graduate School of Nursing, St. Mary's College, Kurume, Fukuoka, Japan

#### **\*Corresponding Author:**

Mayumi Ono, Ph.D.

Department of Pharmaceutical Oncology, Graduate School of Nursing, St. Mary's College  
422 Tsubukuhonmachi, Kurume, Fukuoka, 830-8558, Japan;

TEL : +81-942-50-0721

FAX : +81-942-34-5926

E-mail: ono@st-mary.ac.jp

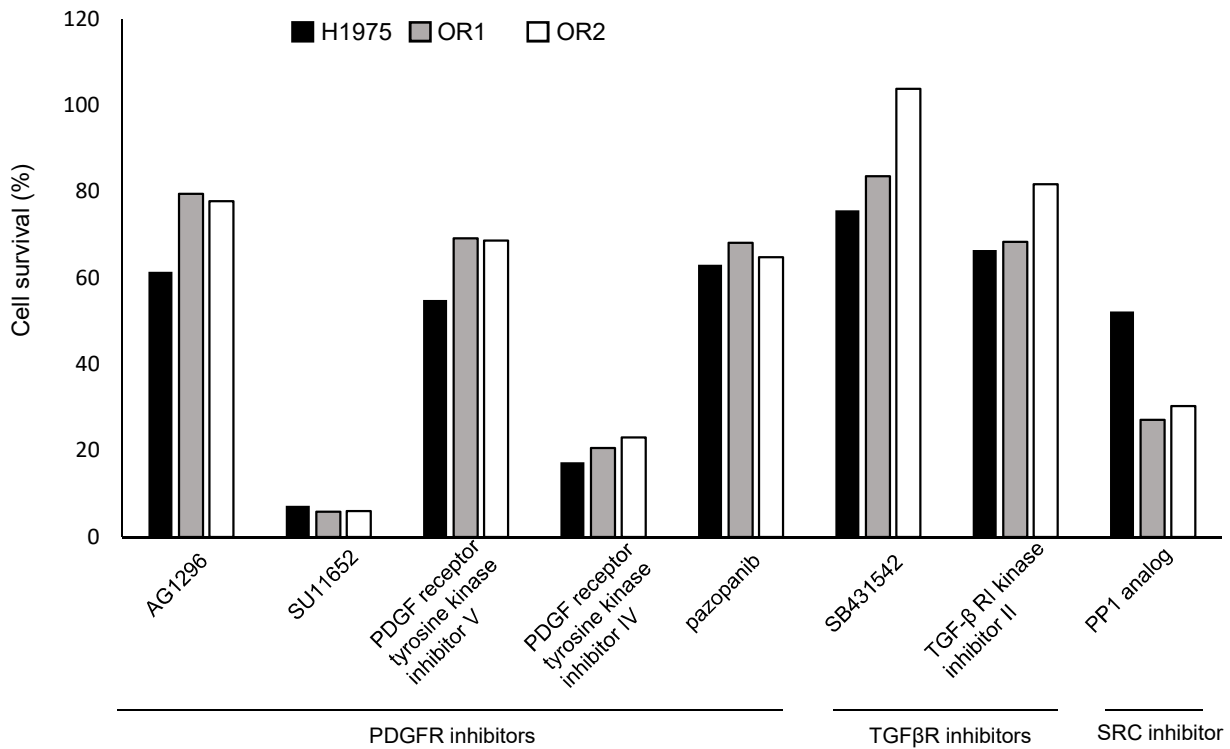

**Figure S1. OR1 and OR2 cells could not exhibit high sensitivities to PDGFR and TGFβR inhibitors as compared with the parental cells.** The sensitivity to kinase inhibitors was assessed using SCADS inhibitor kit. H1975, OR1, and OR2 cells were treated with kinase inhibitors at 5 μM for 96 hours and subjected to WST assay. Values are expressed as the percentage of the value in the absence of drugs.

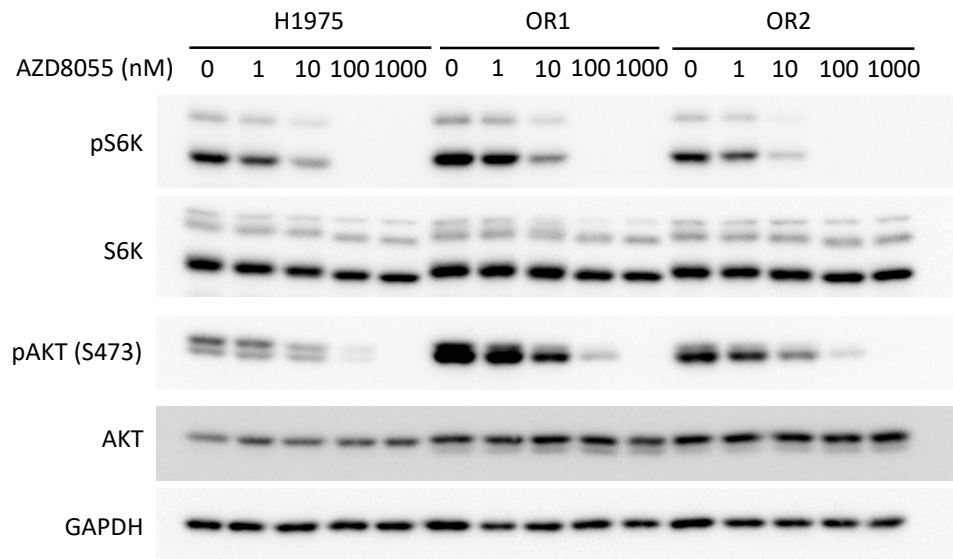

**Figure S2. The inhibitory effects of AZD8055 on S6K and AKT activation.**  
Cells were exposed to AZD8055 for 6 hours.

**Table S1. Osimertinib resistant cells show collateral sensitivity to inhibitors of SFK**

| Drugs            | Targets                  | IC <sub>50</sub> , $\mu\text{M}$ <sup>1)</sup> |                  |                  |
|------------------|--------------------------|------------------------------------------------|------------------|------------------|
|                  |                          | H1975                                          | OR1              | OR2              |
| Crizotinib       | MET, ALK                 | 1.82 (1)                                       | 1.38 (0.76)      | 1.20 (0.66)      |
| PPP              | IGF-1R                   | 0.65 (1)                                       | 0.54 (0.83)      | 0.74 (1.14)      |
| Sorafenib        | RAF, VEGFR2 PDGFR        | 4.74 (1)                                       | 5.32 (1.12)      | 5.21 (1.10)      |
| Dasatinib        | SRC, ABL, KIT, EPH       | 0.23 (1)                                       | 0.0049 (0.021)   | 0.0207 (0.09)    |
| PP1              | SRC, LCK, FYN, KIT, EGFR | 9.60 (1)                                       | 1.88 (0.20)      | 3.07 (0.32)      |
| Saracatinib      | SRC, LCK, FYN, KIT, EGFR | 3.65 (1)                                       | 0.55 (0.15)      | 0.53 (0.15)      |
| AZD8055          | mTORC1, C2               | 0.048 (1)                                      | 0.015 (0.31)     | 0.016 (0.33)     |
| GSK650394        | SGK1/2                   | 65.24 (1)                                      | 20.59 (0.32)     | 53.78 (0.82)     |
| LY294002         | PI3K                     | 21.35 (1)                                      | 9.79 (0.46)      | 17.10 (0.80)     |
| AKT inhibitor IV | AKT                      | 0.19 (1)                                       | 0.21 (1.11)      | 0.28 (1.47)      |
| U0126            | MEK1/2                   | ND <sup>2)</sup>                               | ND <sup>2)</sup> | ND <sup>2)</sup> |
| SP600125         | JNK1/2, Aurora A         | 22.30 (1)                                      | 51.76 (2.32)     | 26.83 (1.20)     |

1) IC<sub>50</sub> values ( $\mu\text{M}$ ) are presented as average values of triplicate experiments. The relative drug sensitivity for each drug is presented in parenthesis as the IC<sub>50</sub> of OR1/2 normalized to the IC<sub>50</sub> of H1975 cells.

2) ND: not detectable, no cell toxicity is seen by the drug up to 30  $\mu\text{M}$

# Original western blot images

## Figure 1a

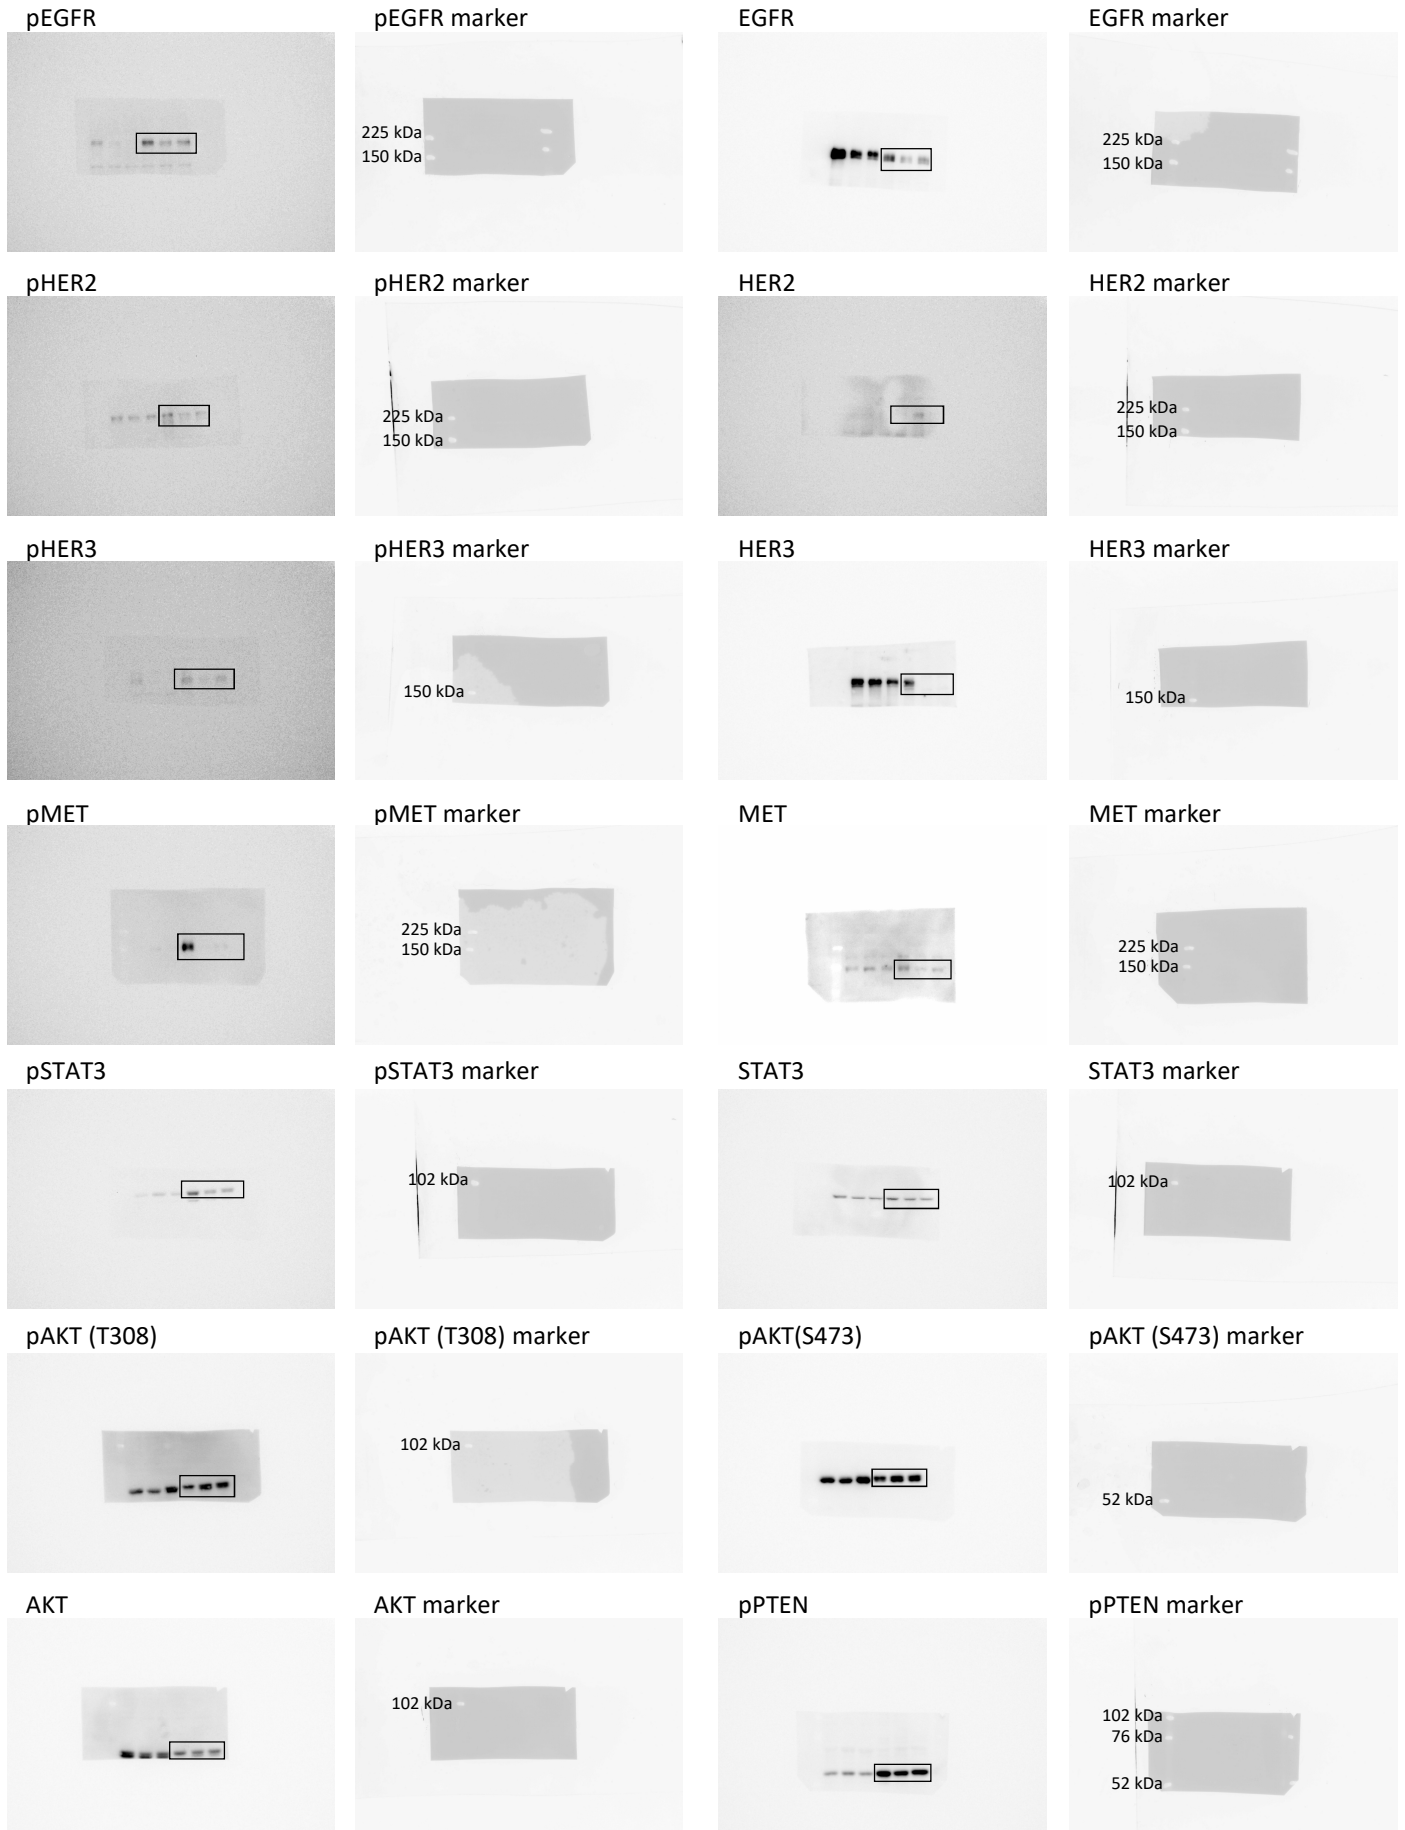

# Figure 1a

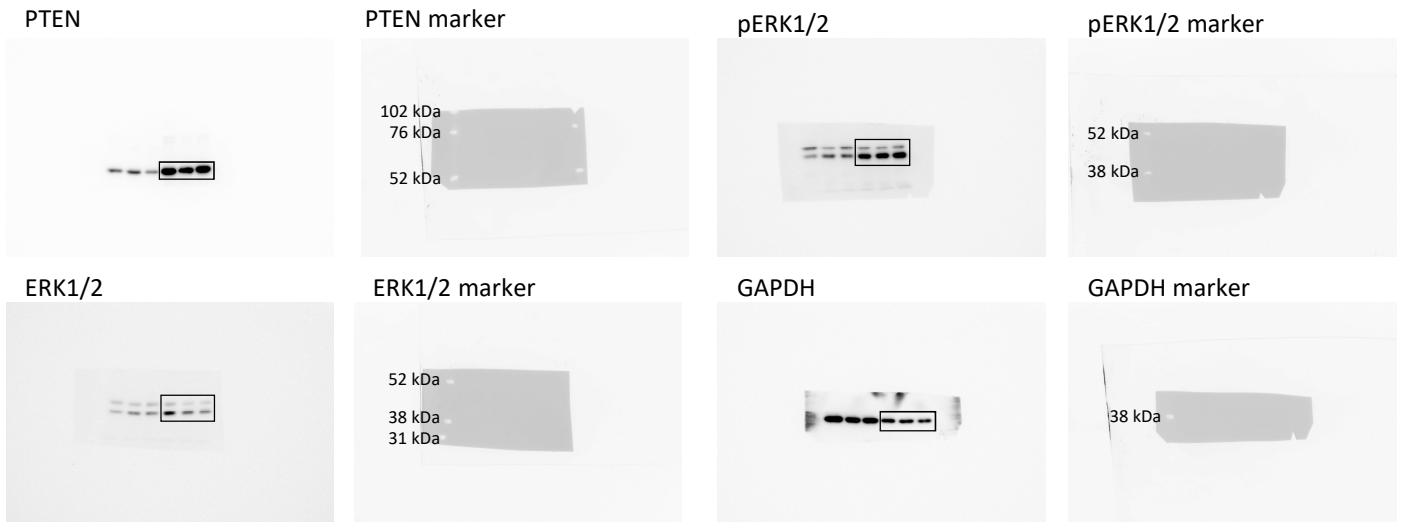

**Figure 1b**

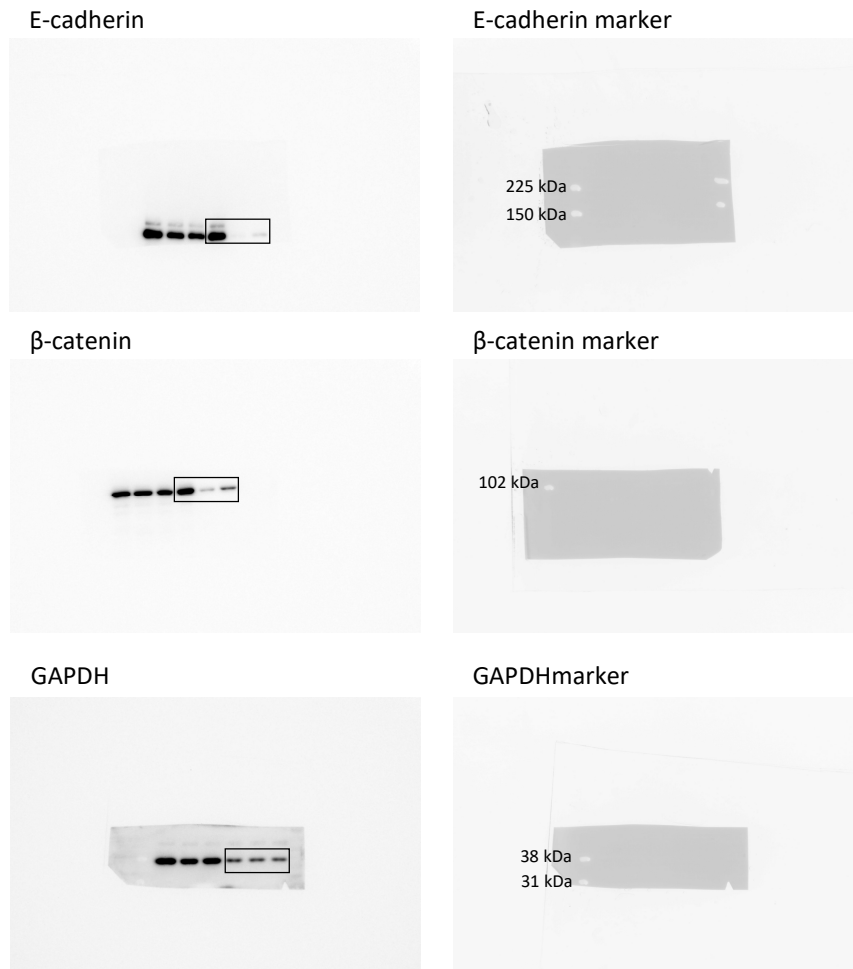

**Figure 1c**

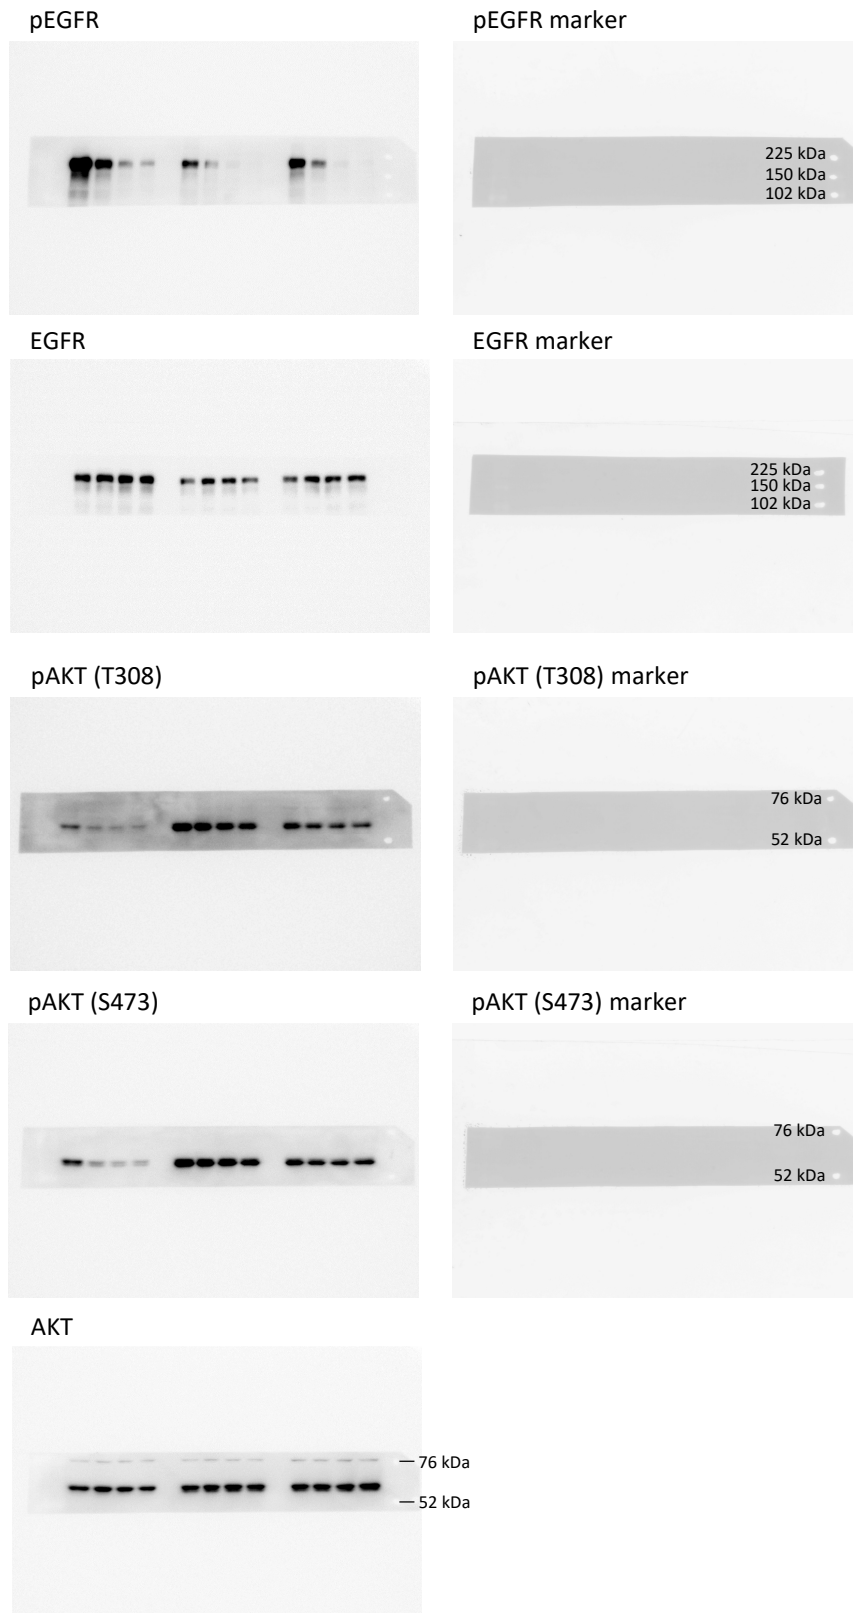



**Figure 1c**

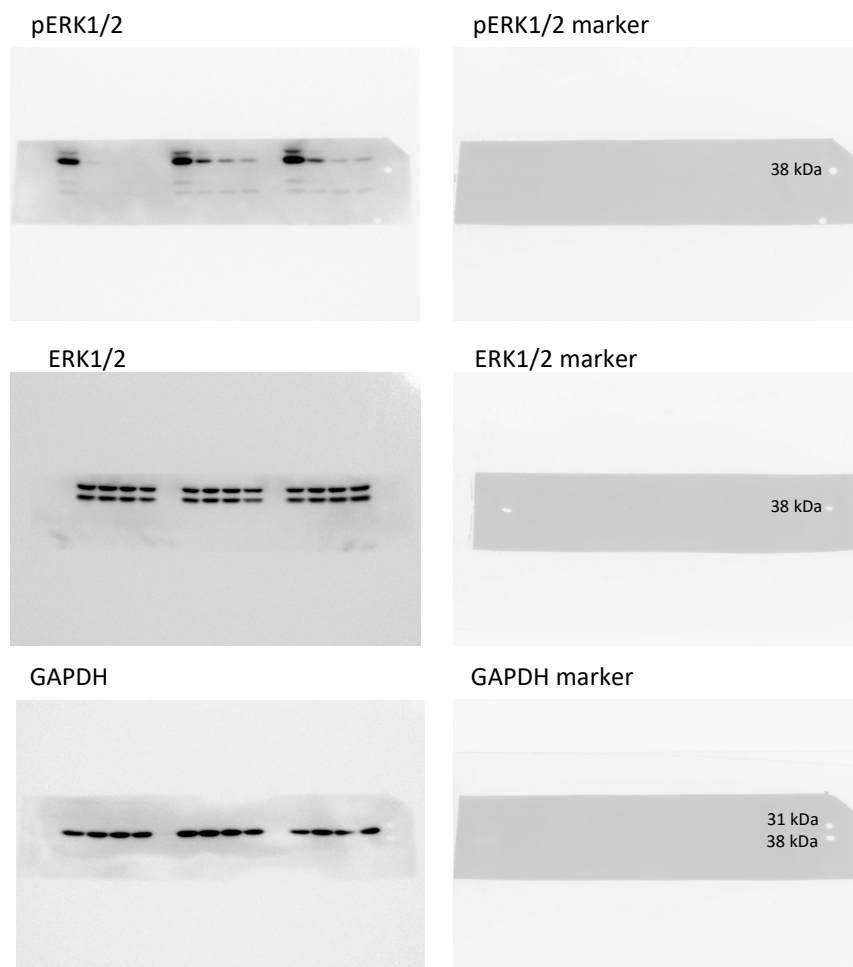

**Figure 2a**

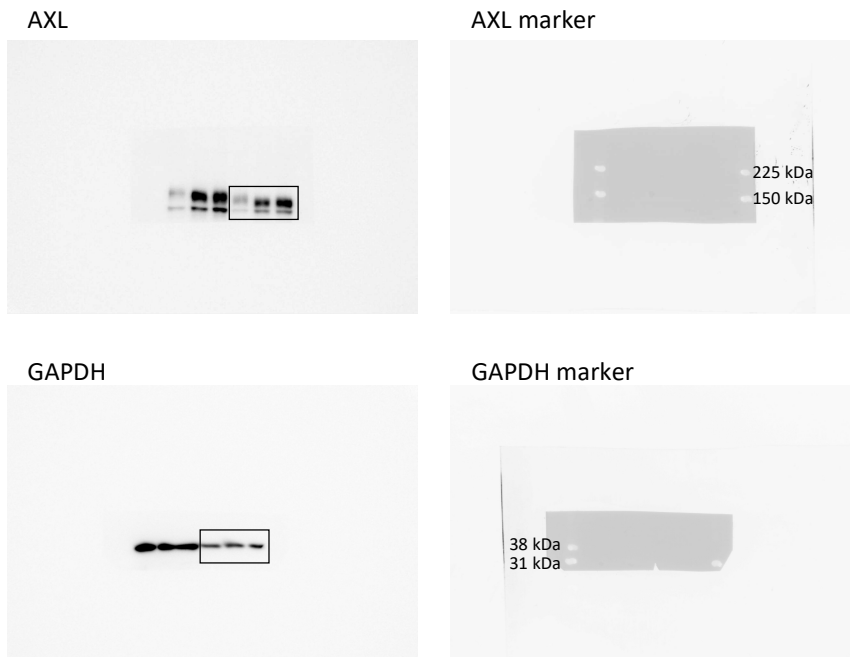

**Figure 2b**

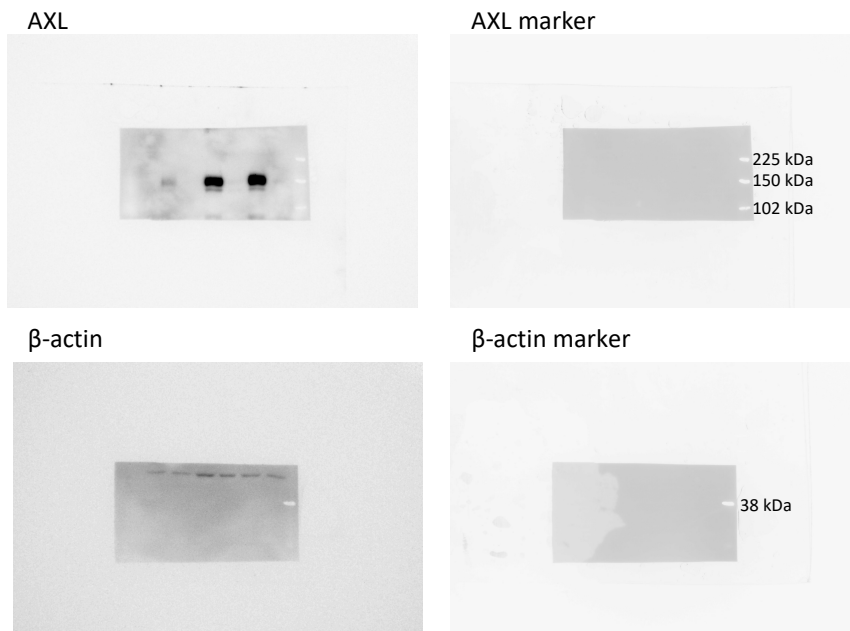

# Figure 2d

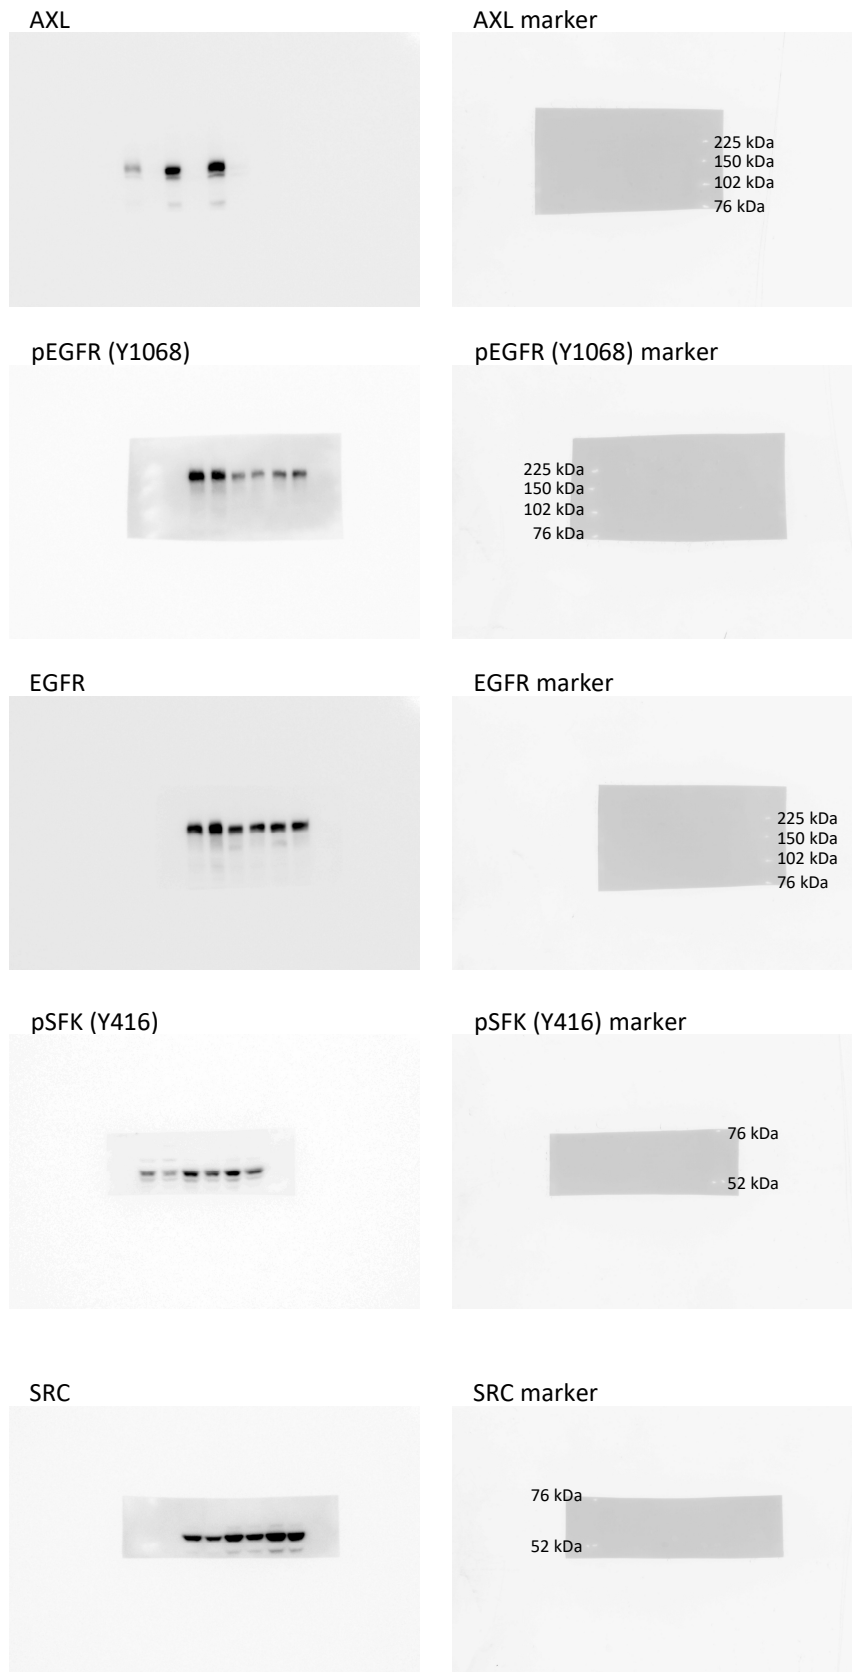

**Figure 2d**

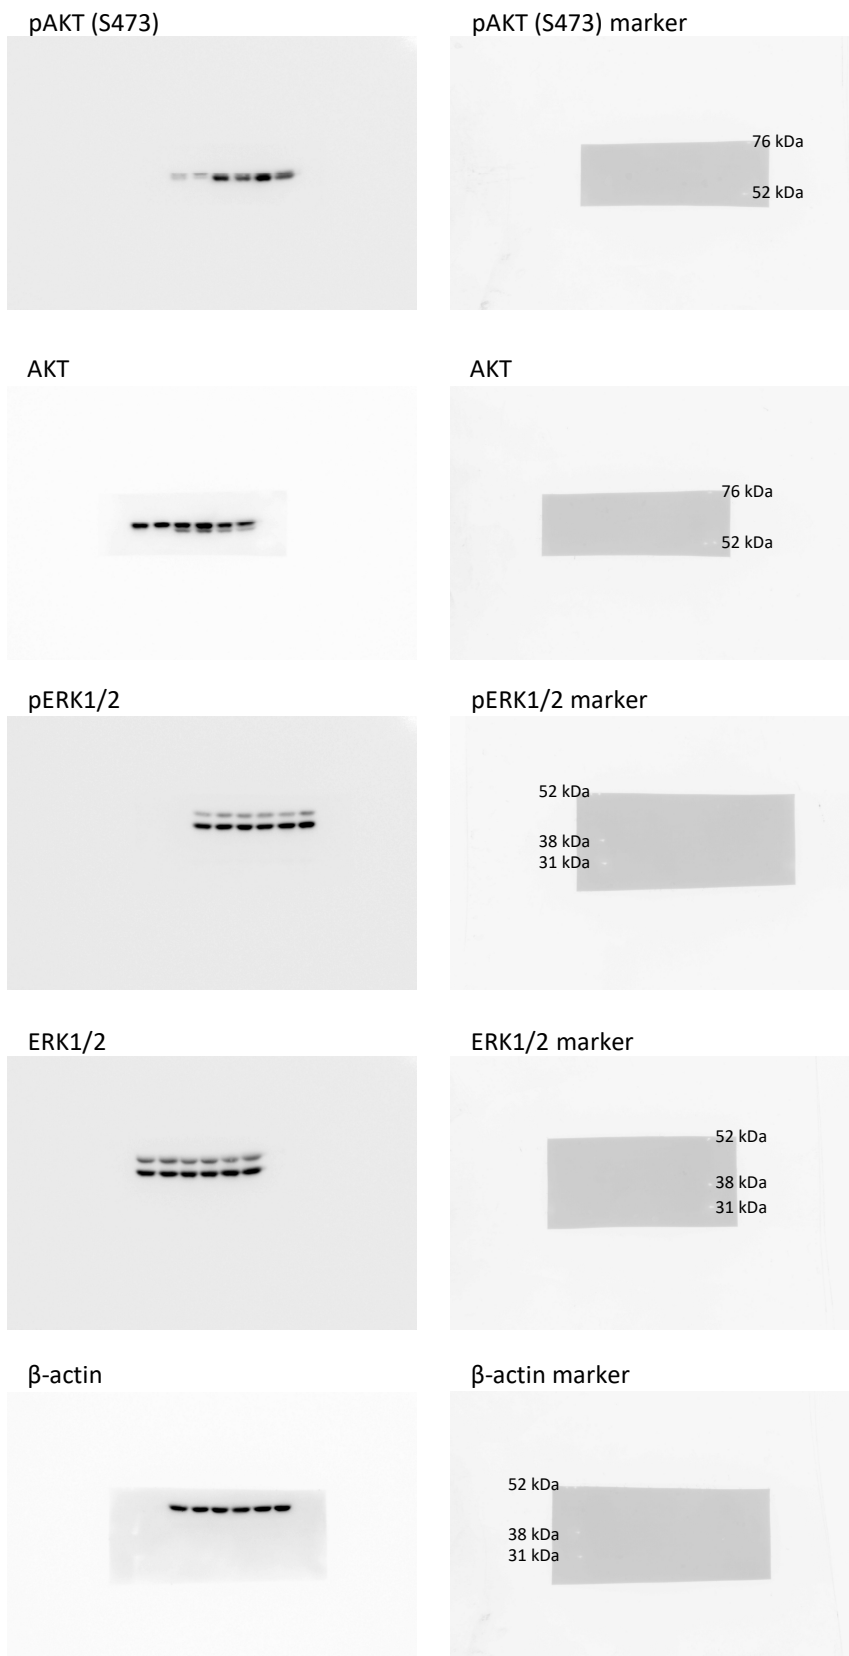

# Figure 2f

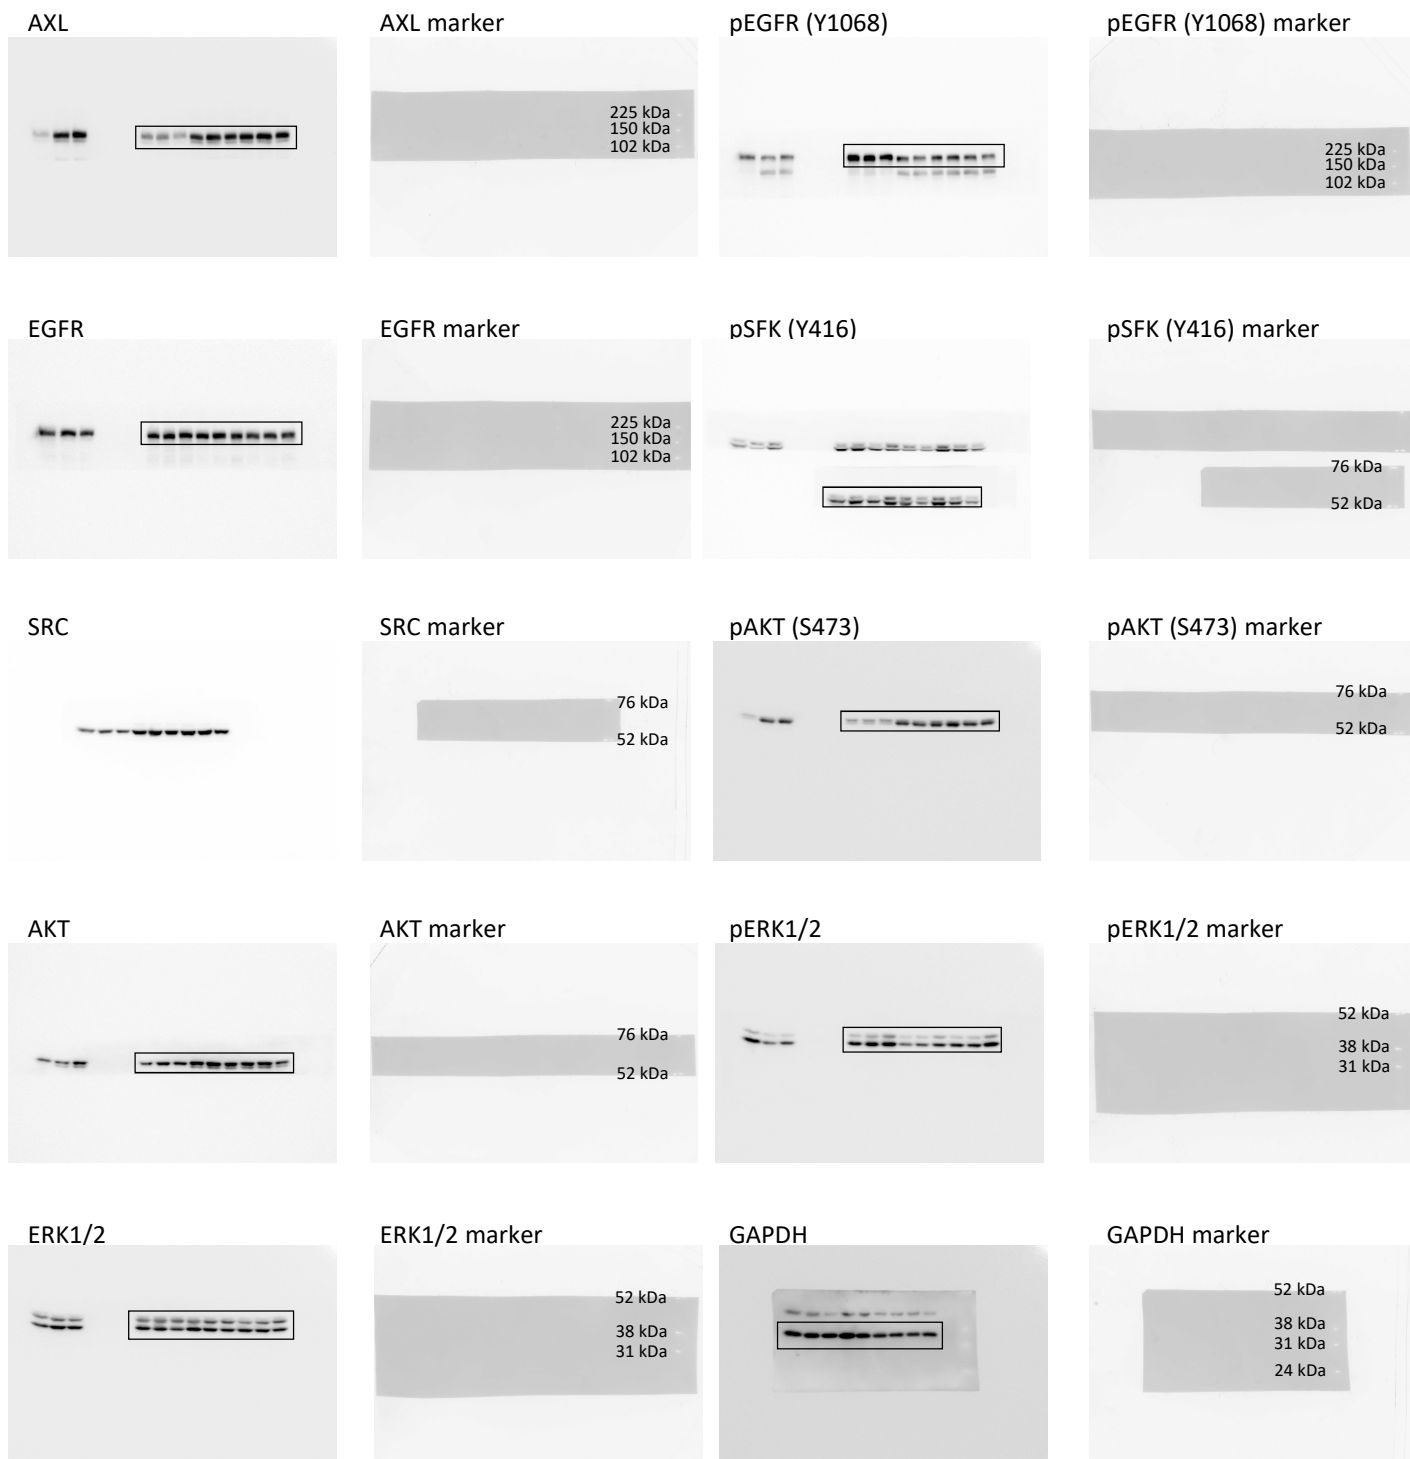

### Figure 3a

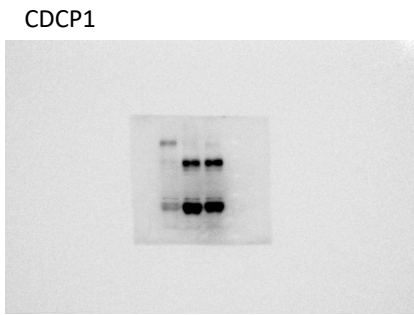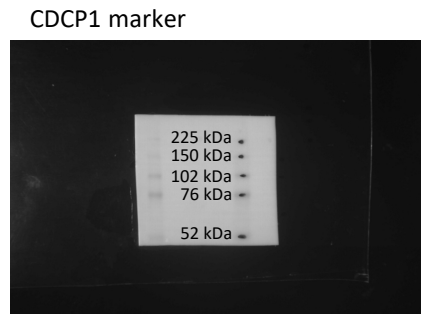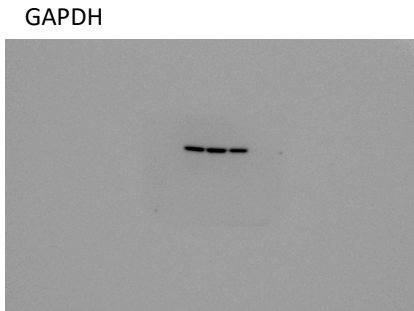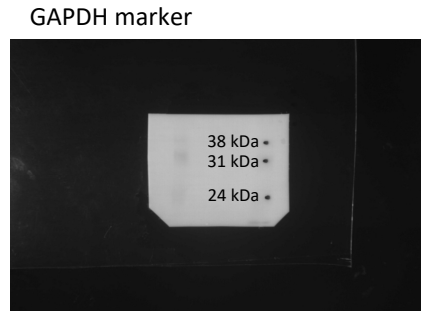

### Figure 3b

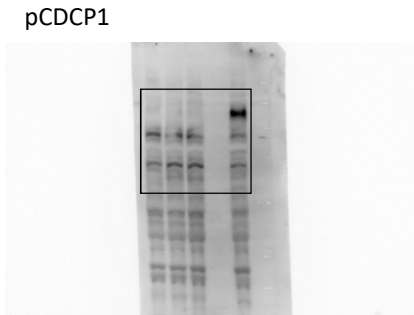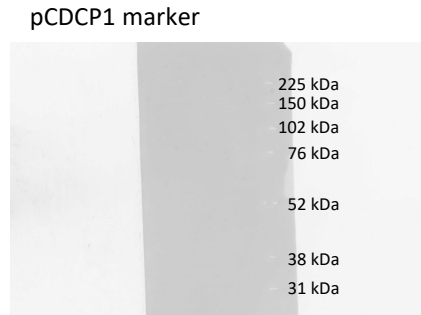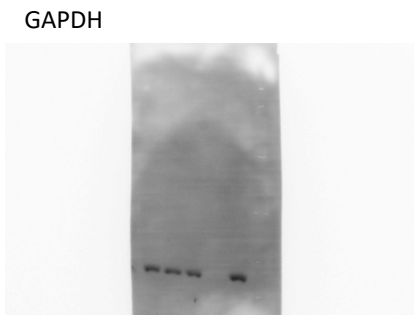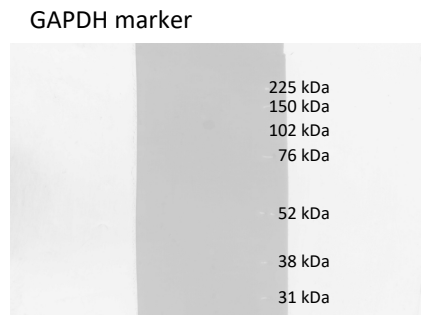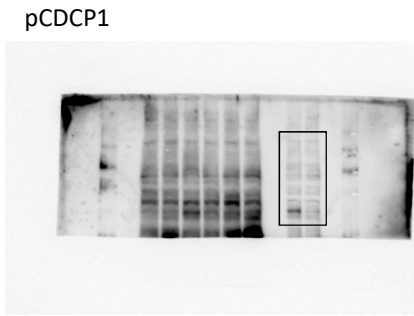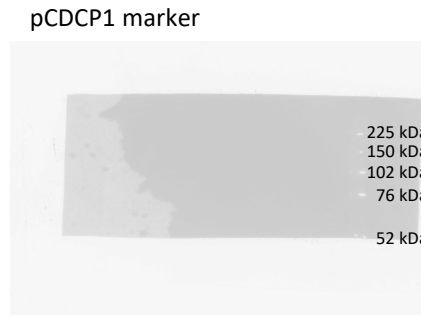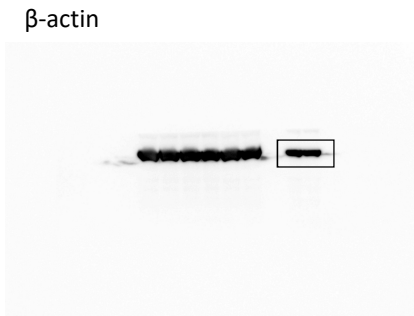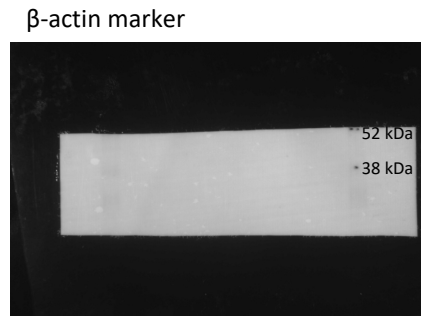

# Figure 3d

CDCP1

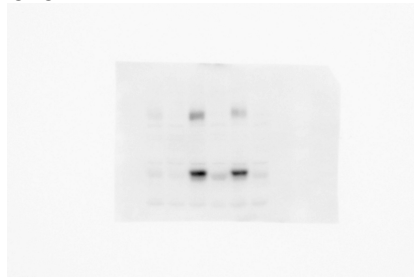

CDCP1 marker

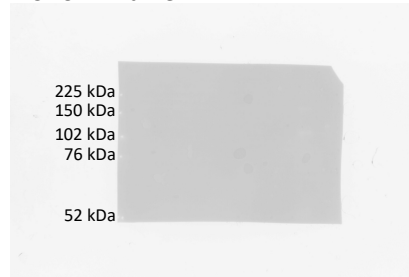

pSFK (Y416)

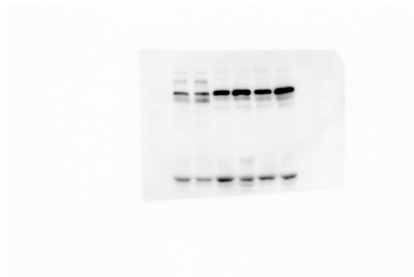

pSFK (Y416) marker

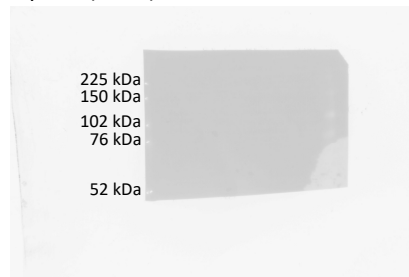

SRC

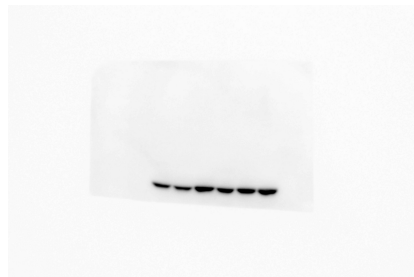

SRC marker

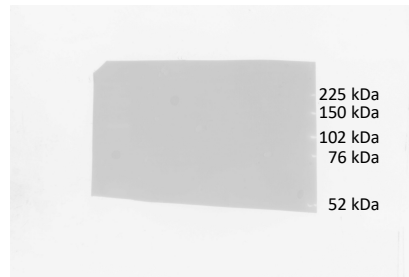

pAKT (T308)

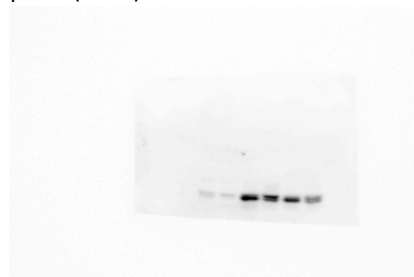

pAKT (T308) marker

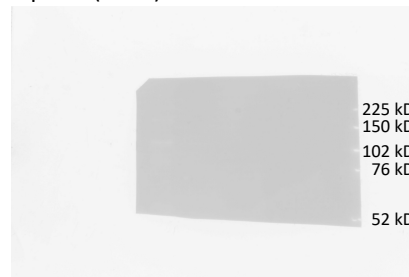

pAKT (S473)

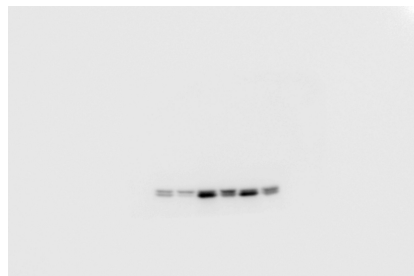

pAKT (S473) marker

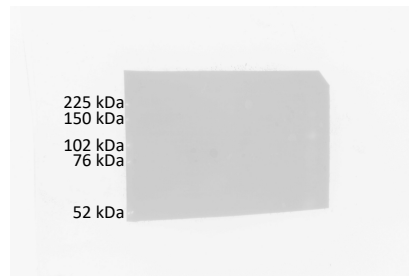

**Figure 3d**

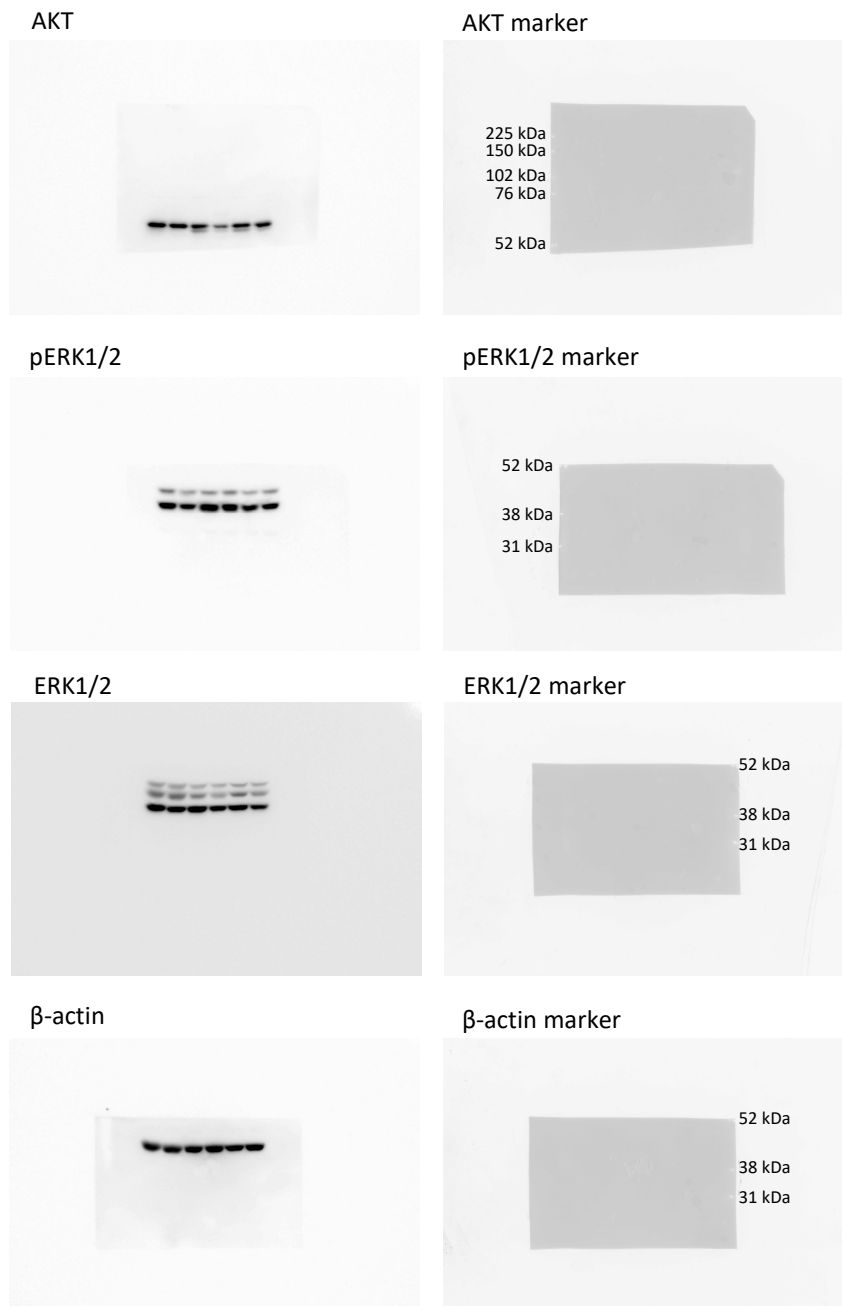



**Figure 3e**

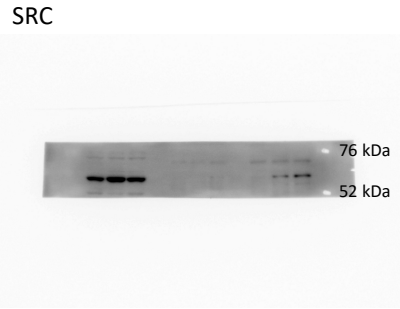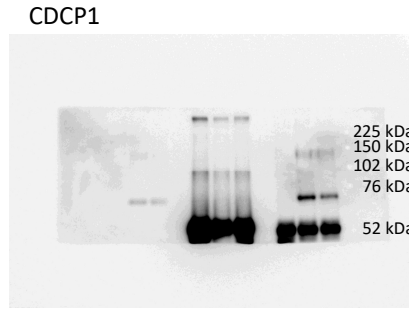

**Figure 3f**

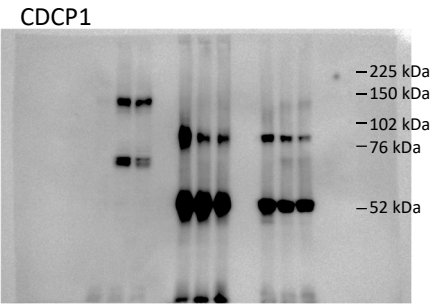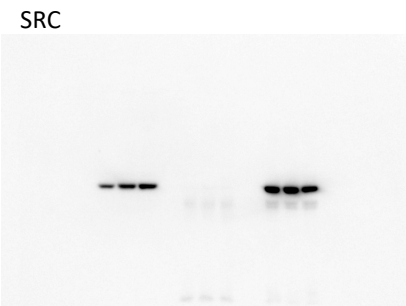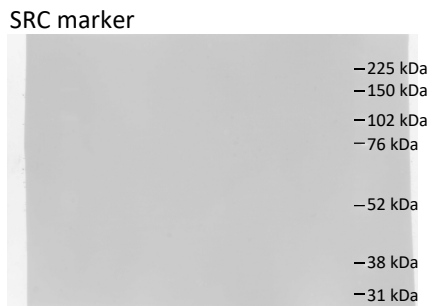

**Figure 4a**

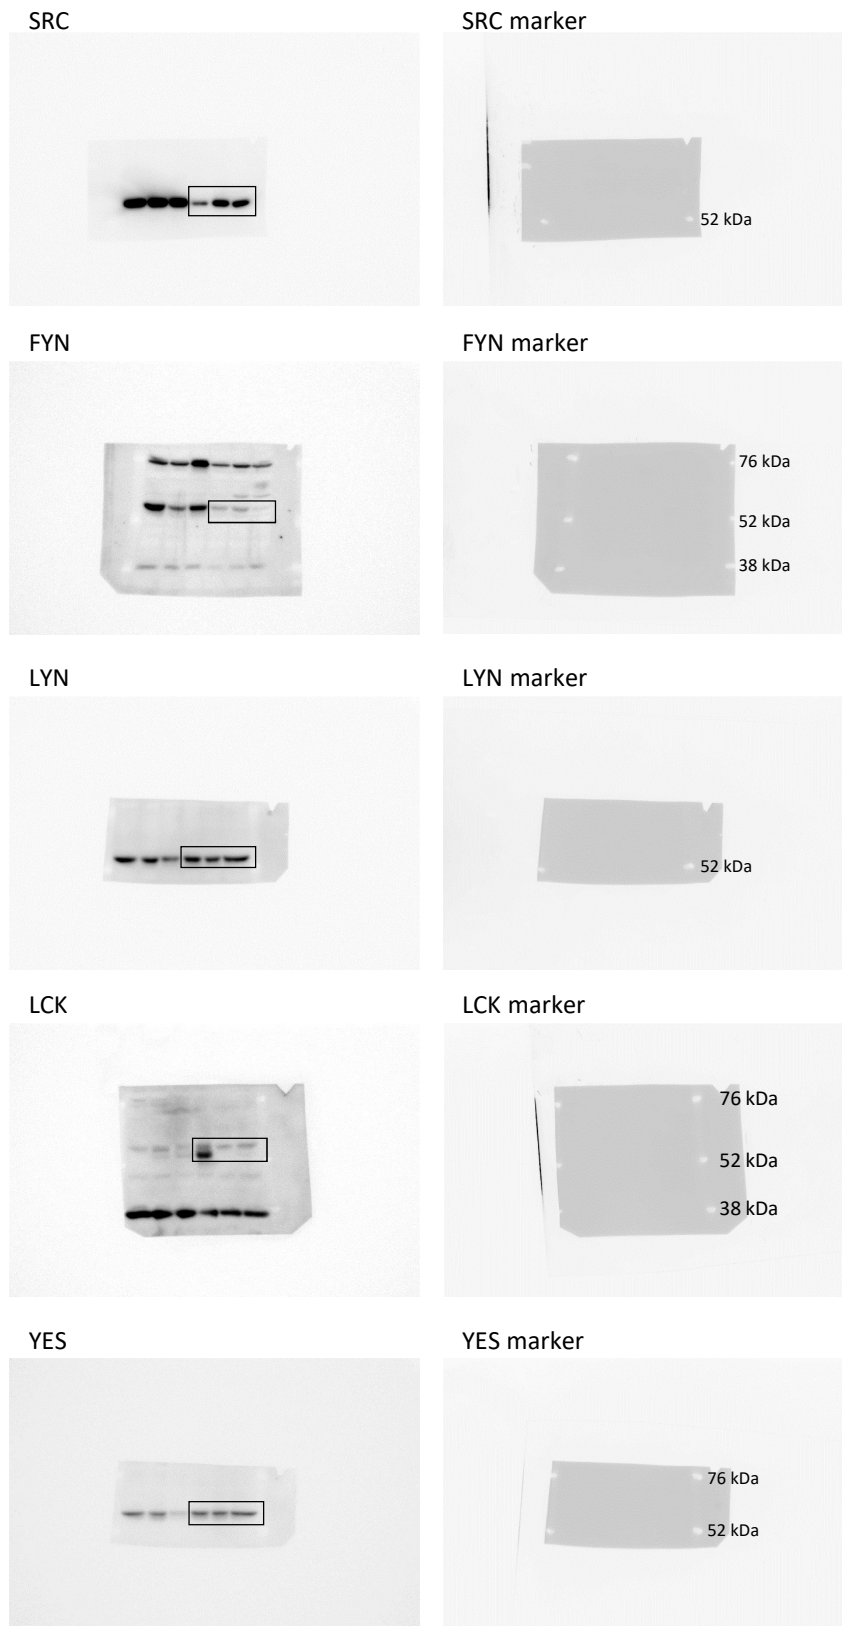

**Figure 4a**

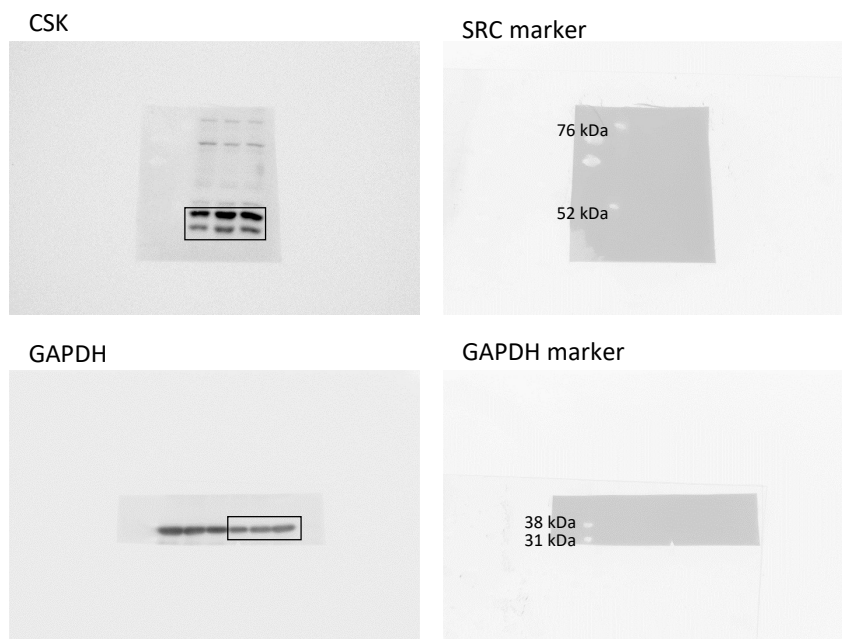

**Figure 4c**

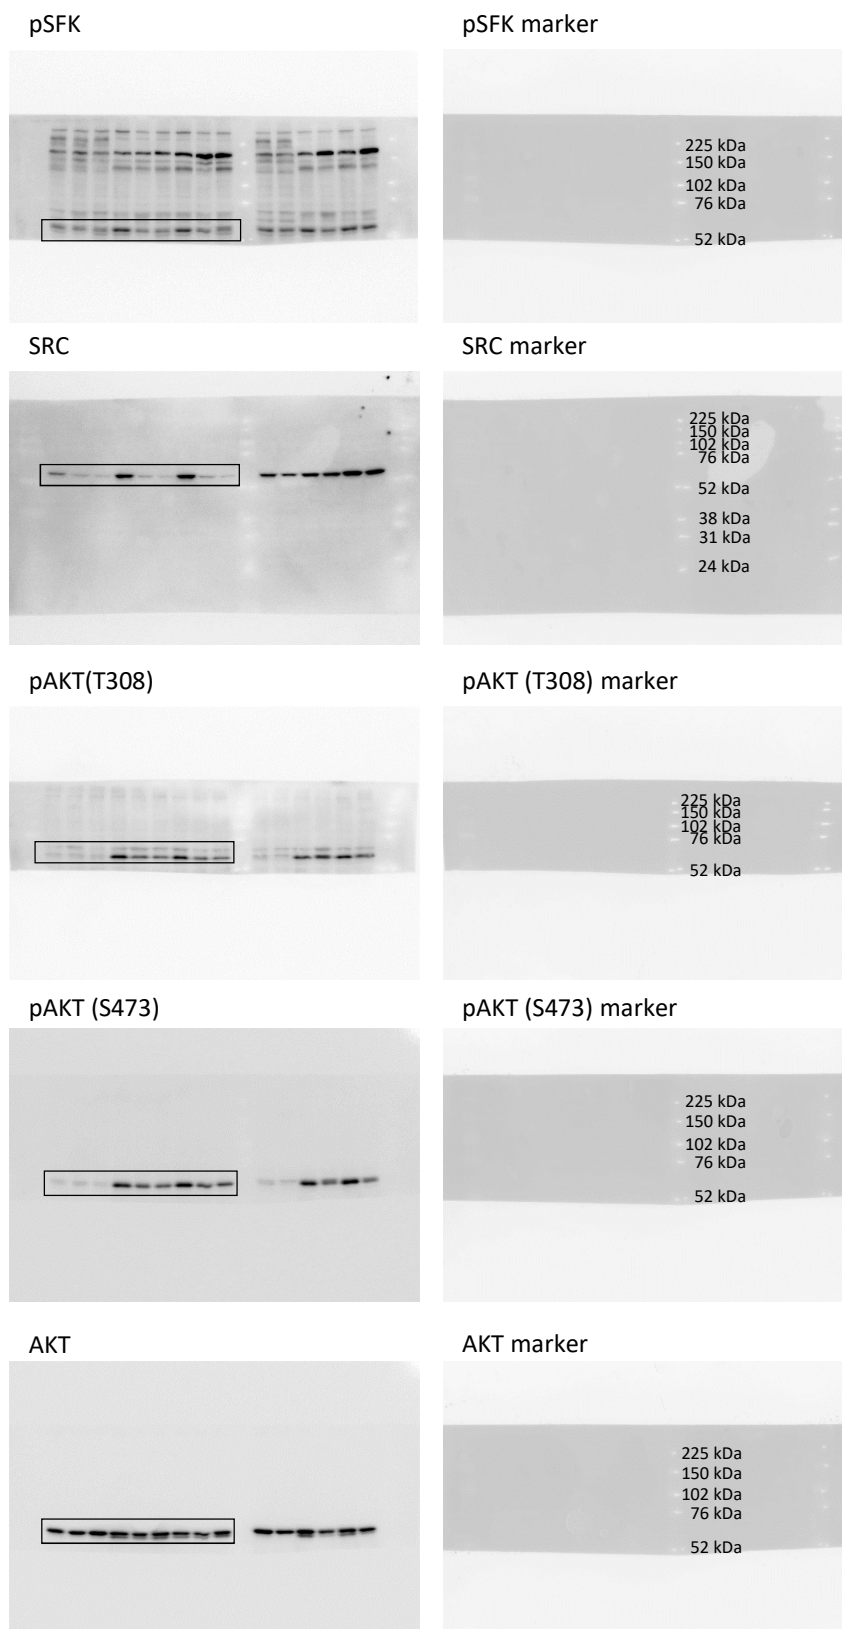

**Figure 4c**

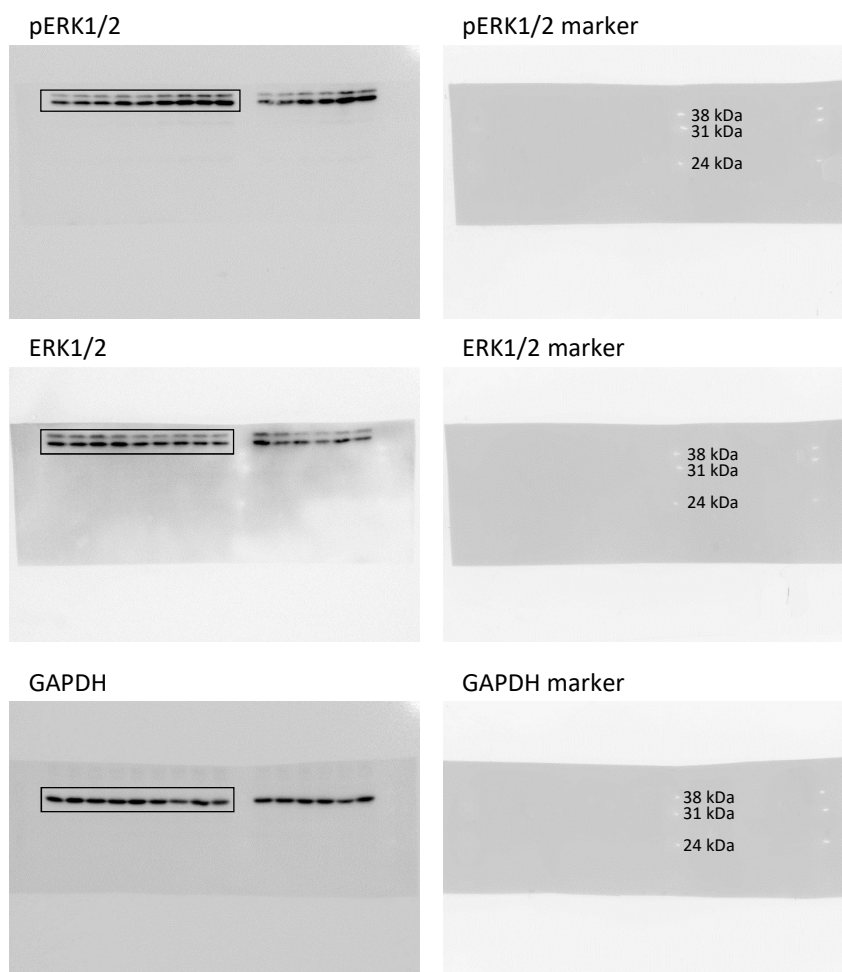

**Figure 4e**

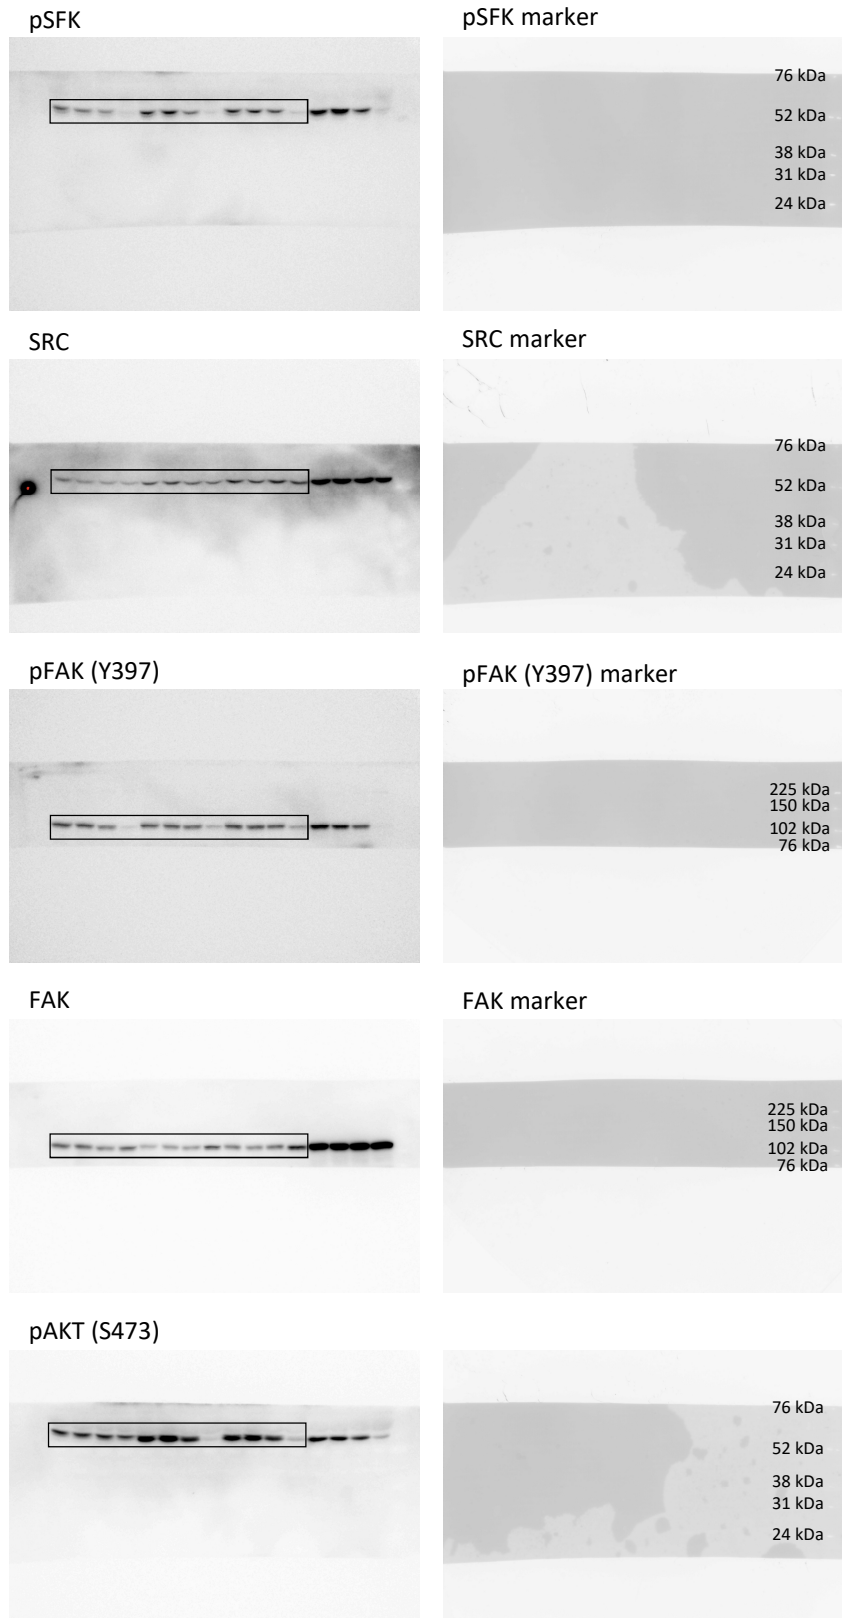

**Figure 4e**

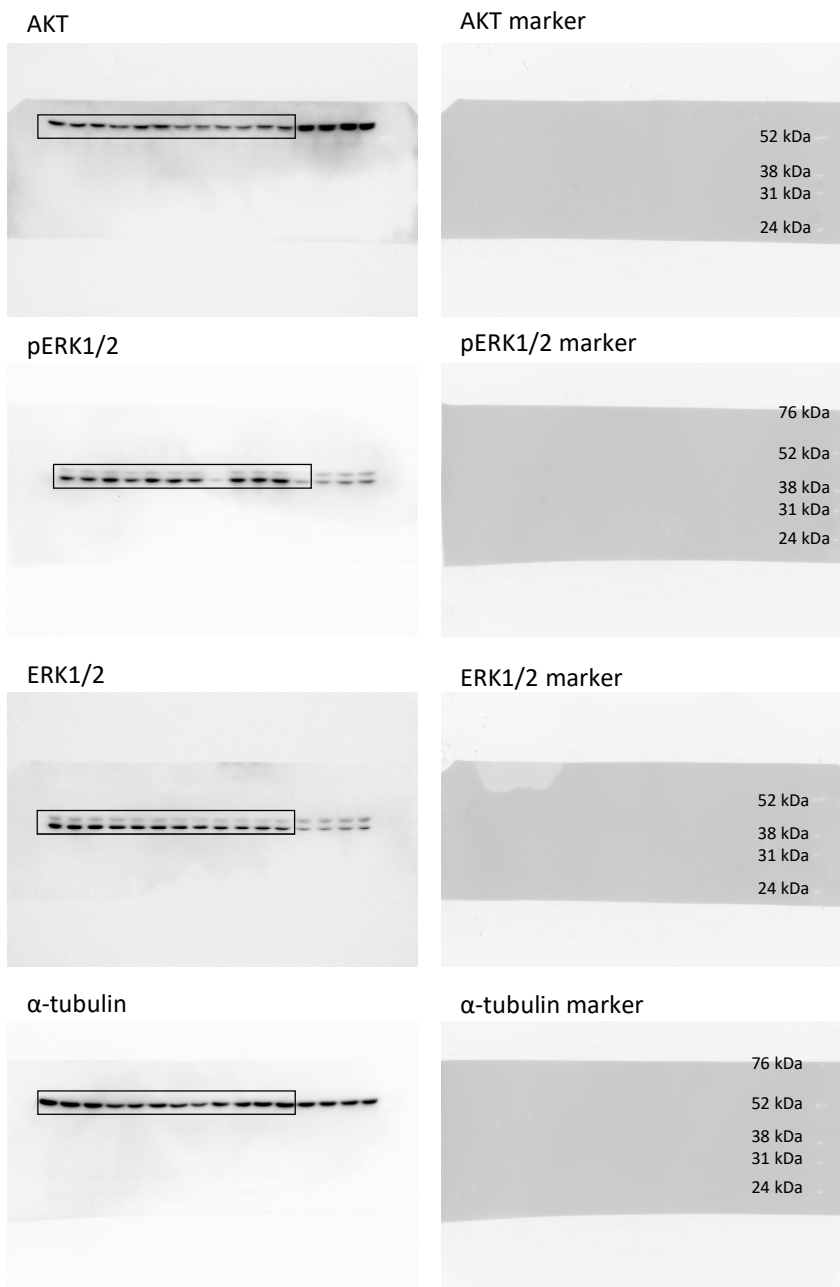

# Figure 4g

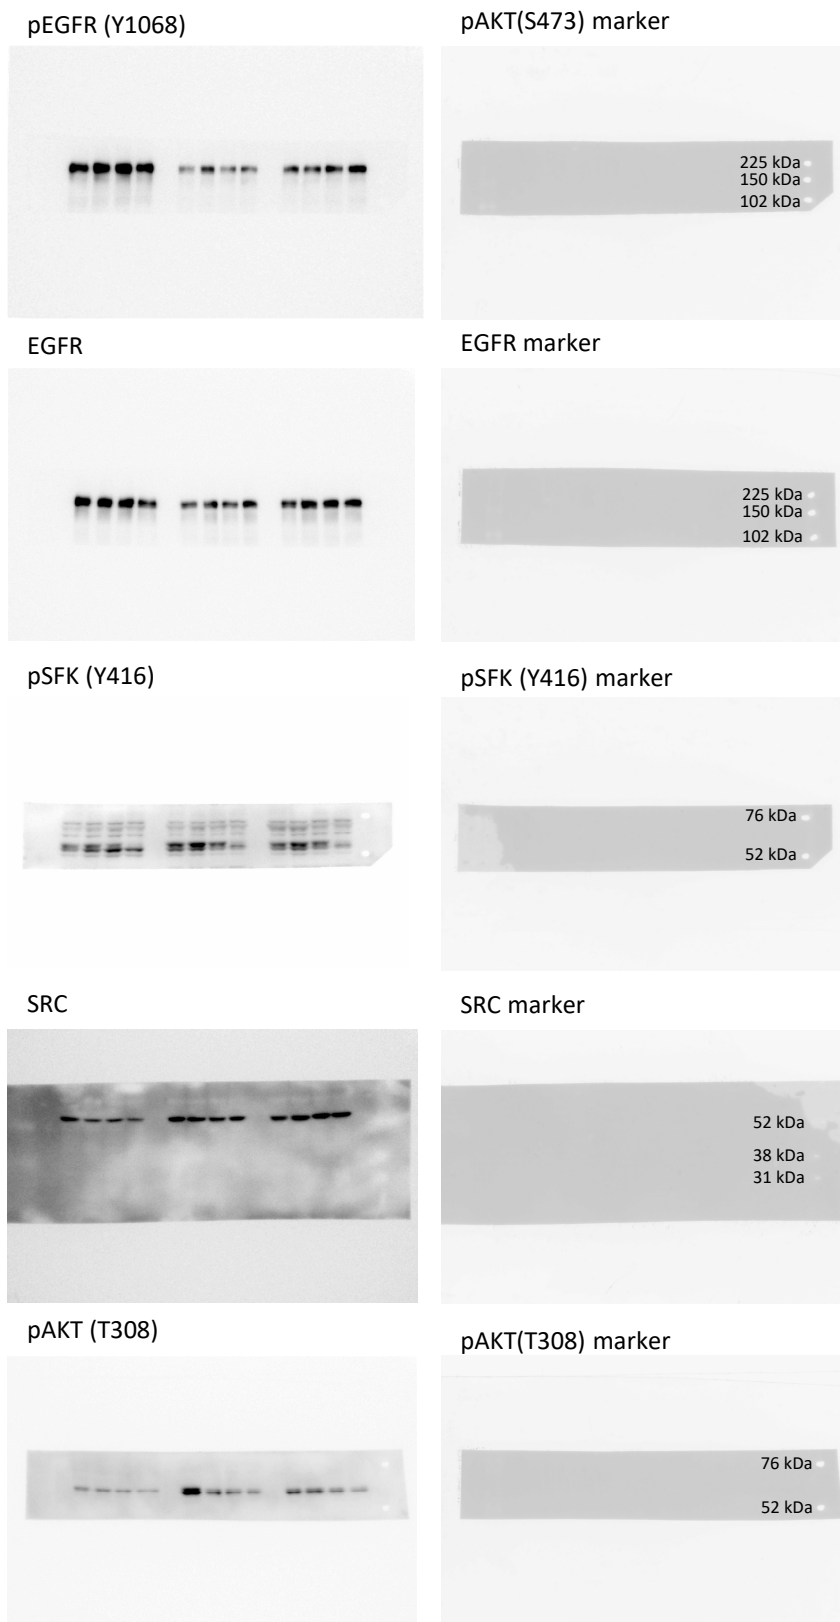



# Figure 4g

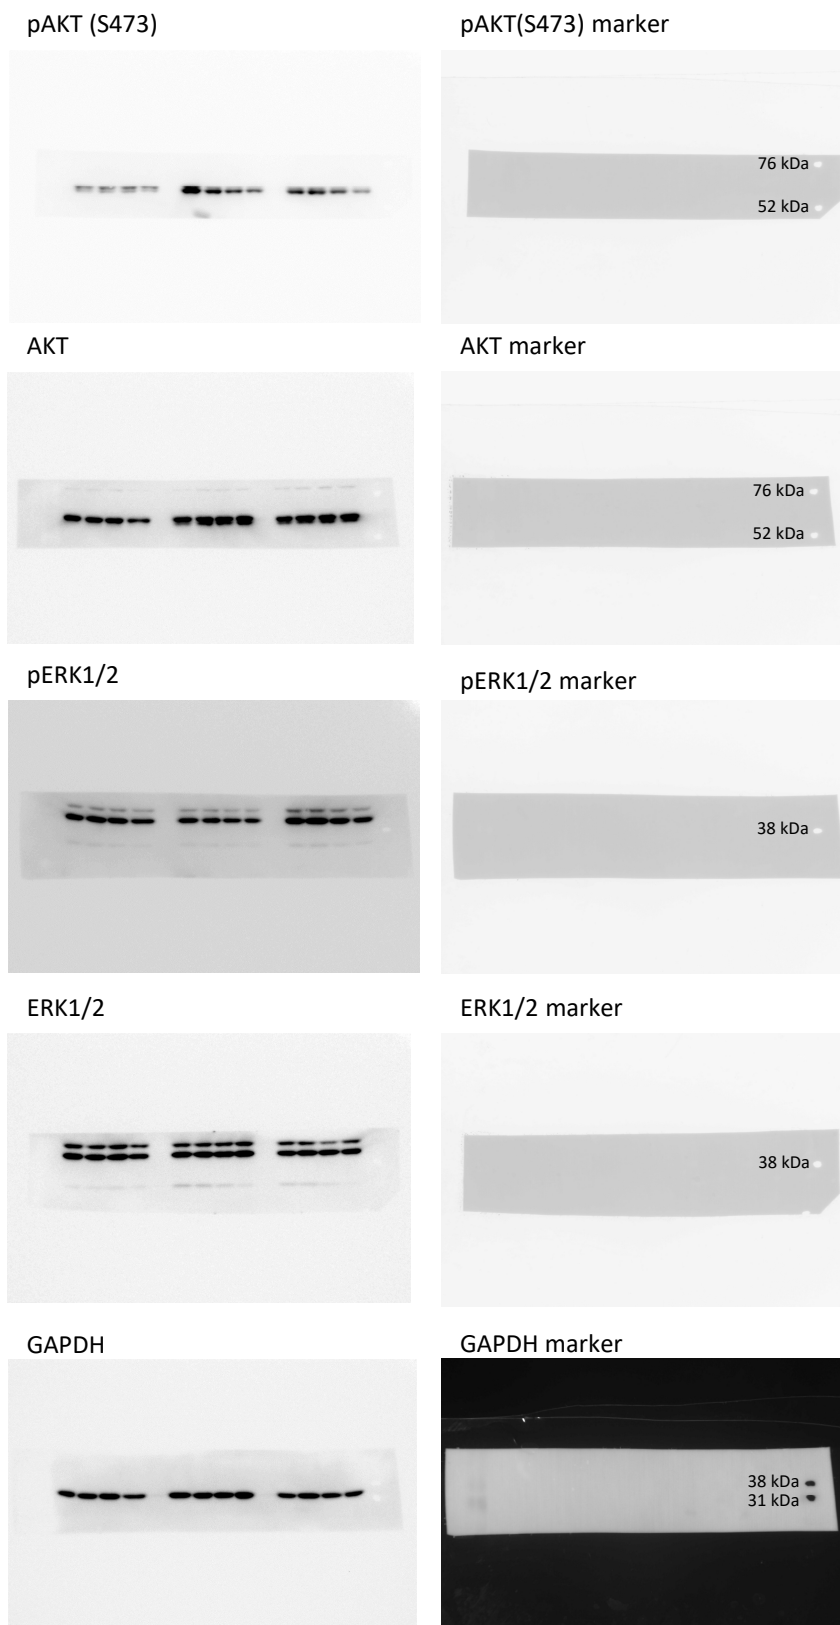

**Figure 4i**

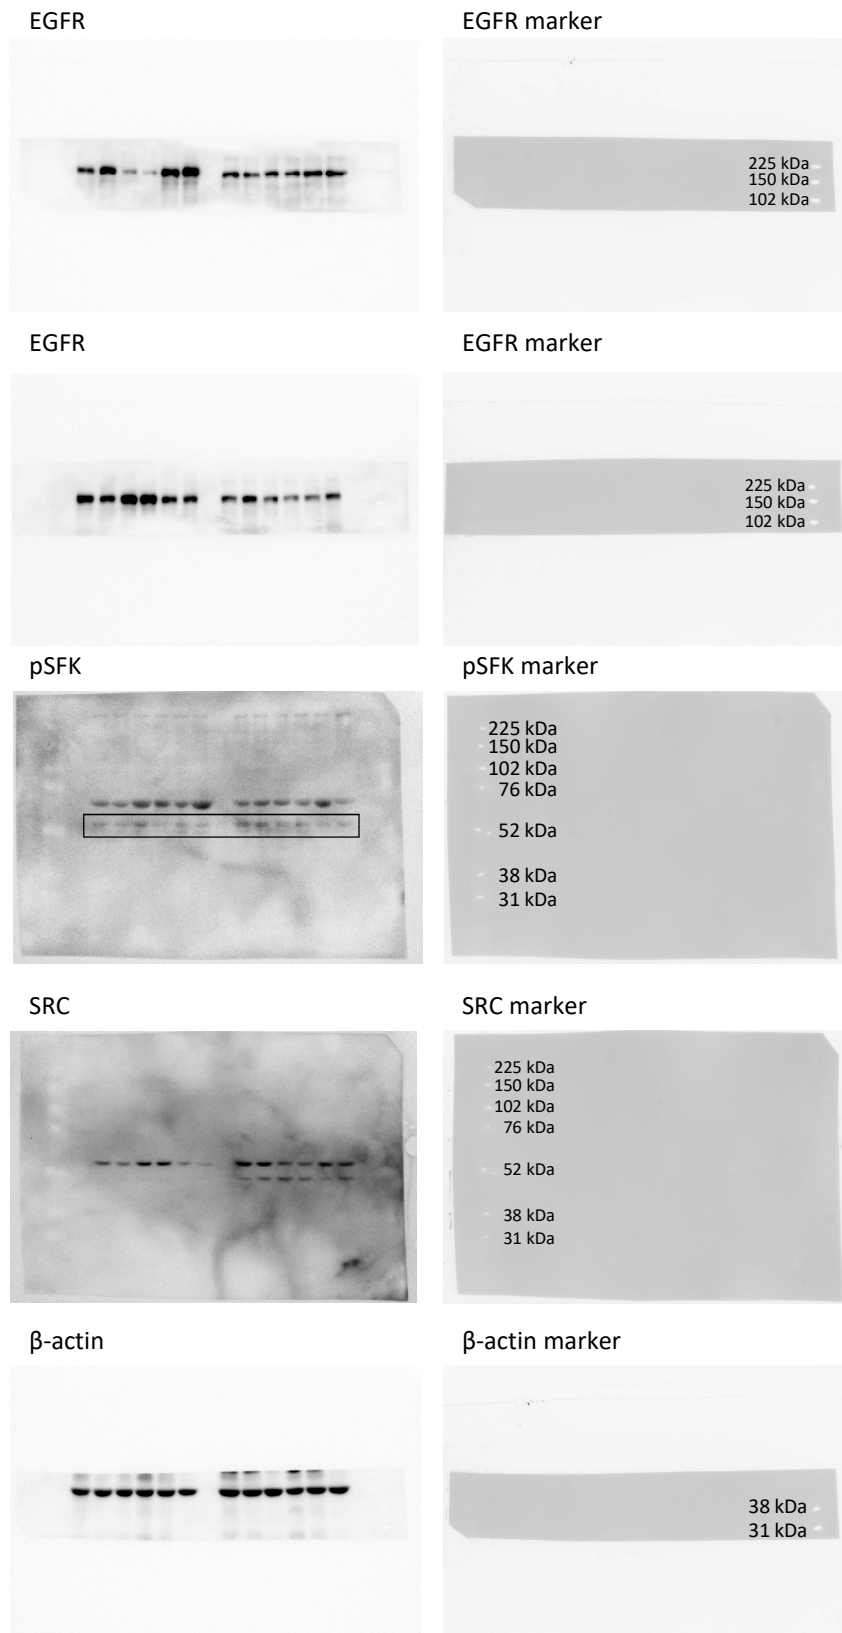

**Figure 5c**

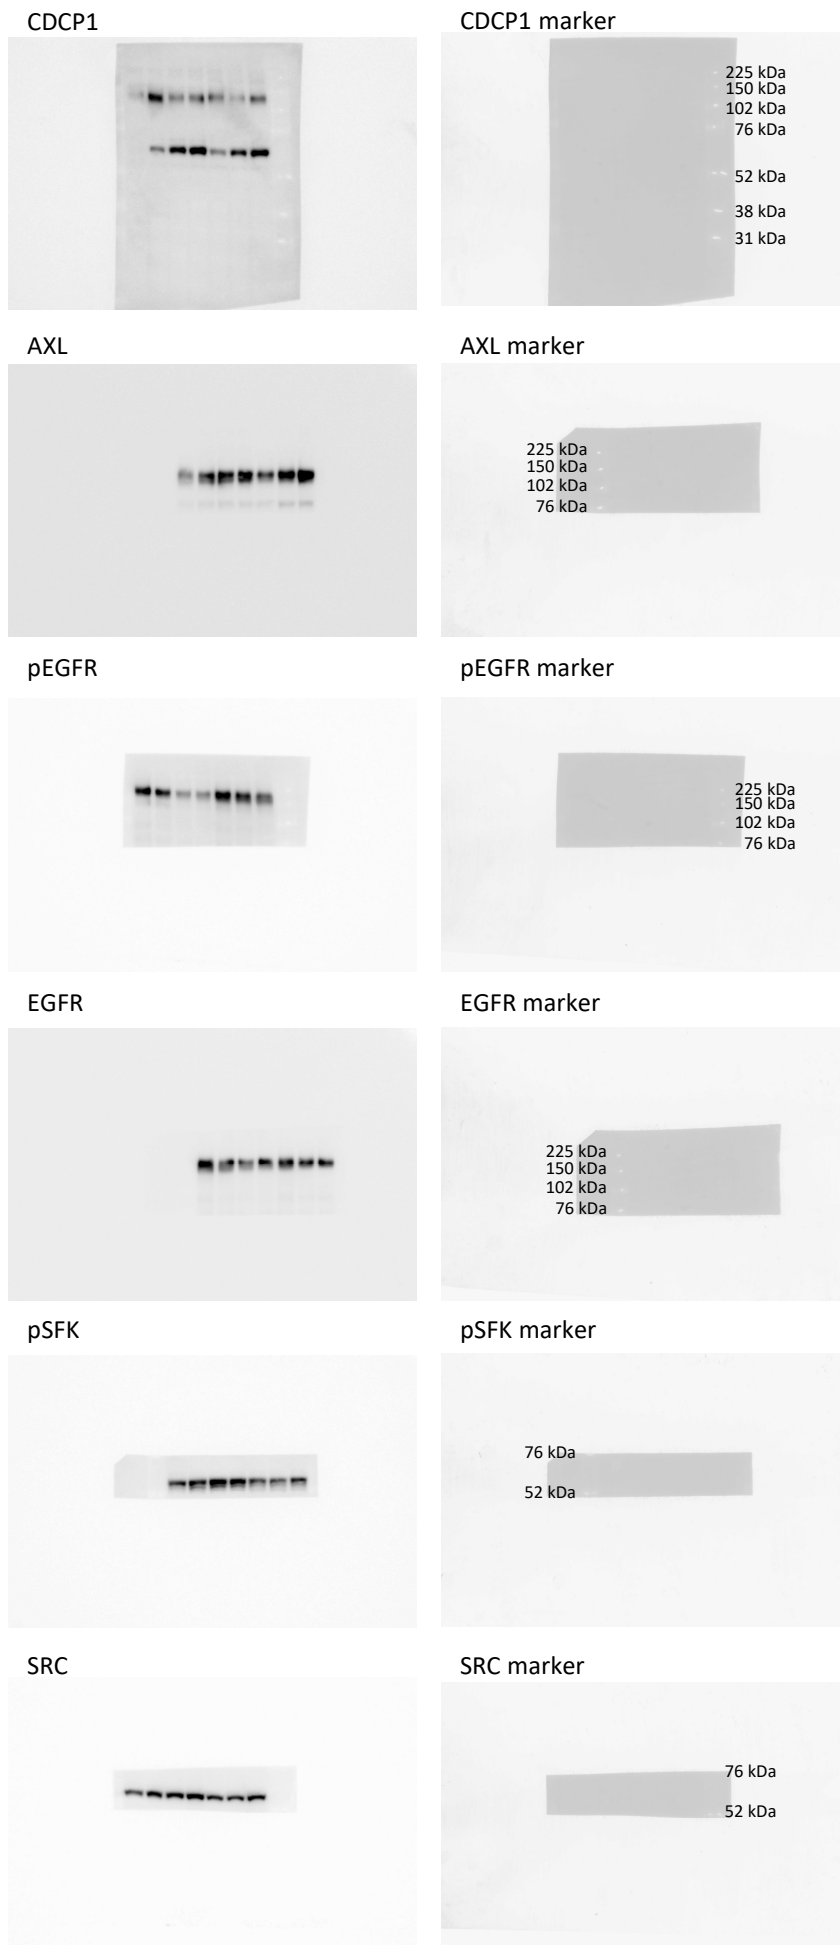

**Figure 5c**

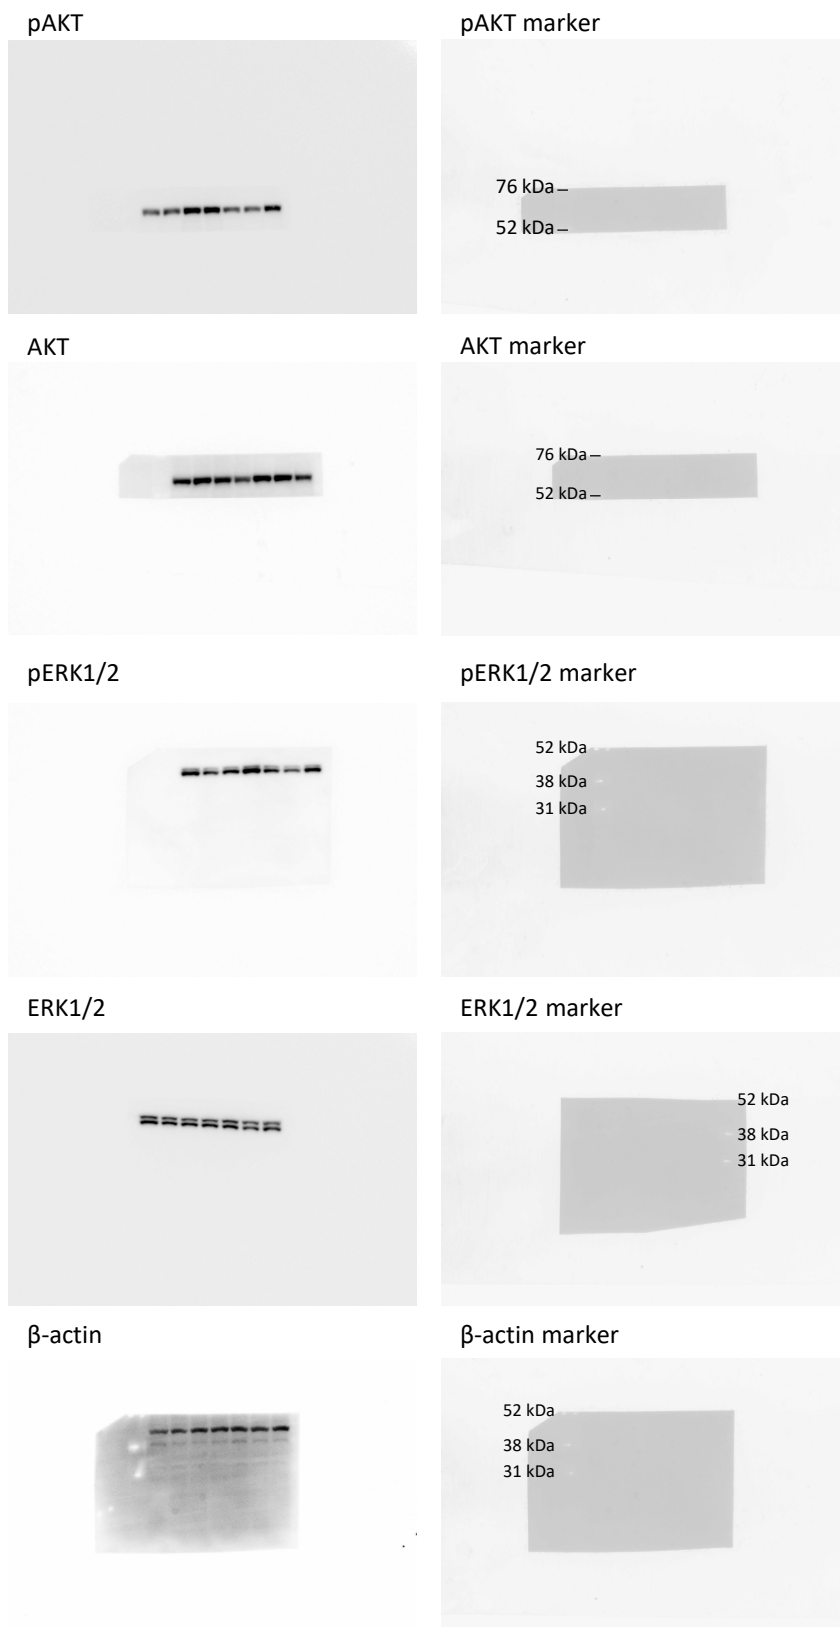

# Figure S2

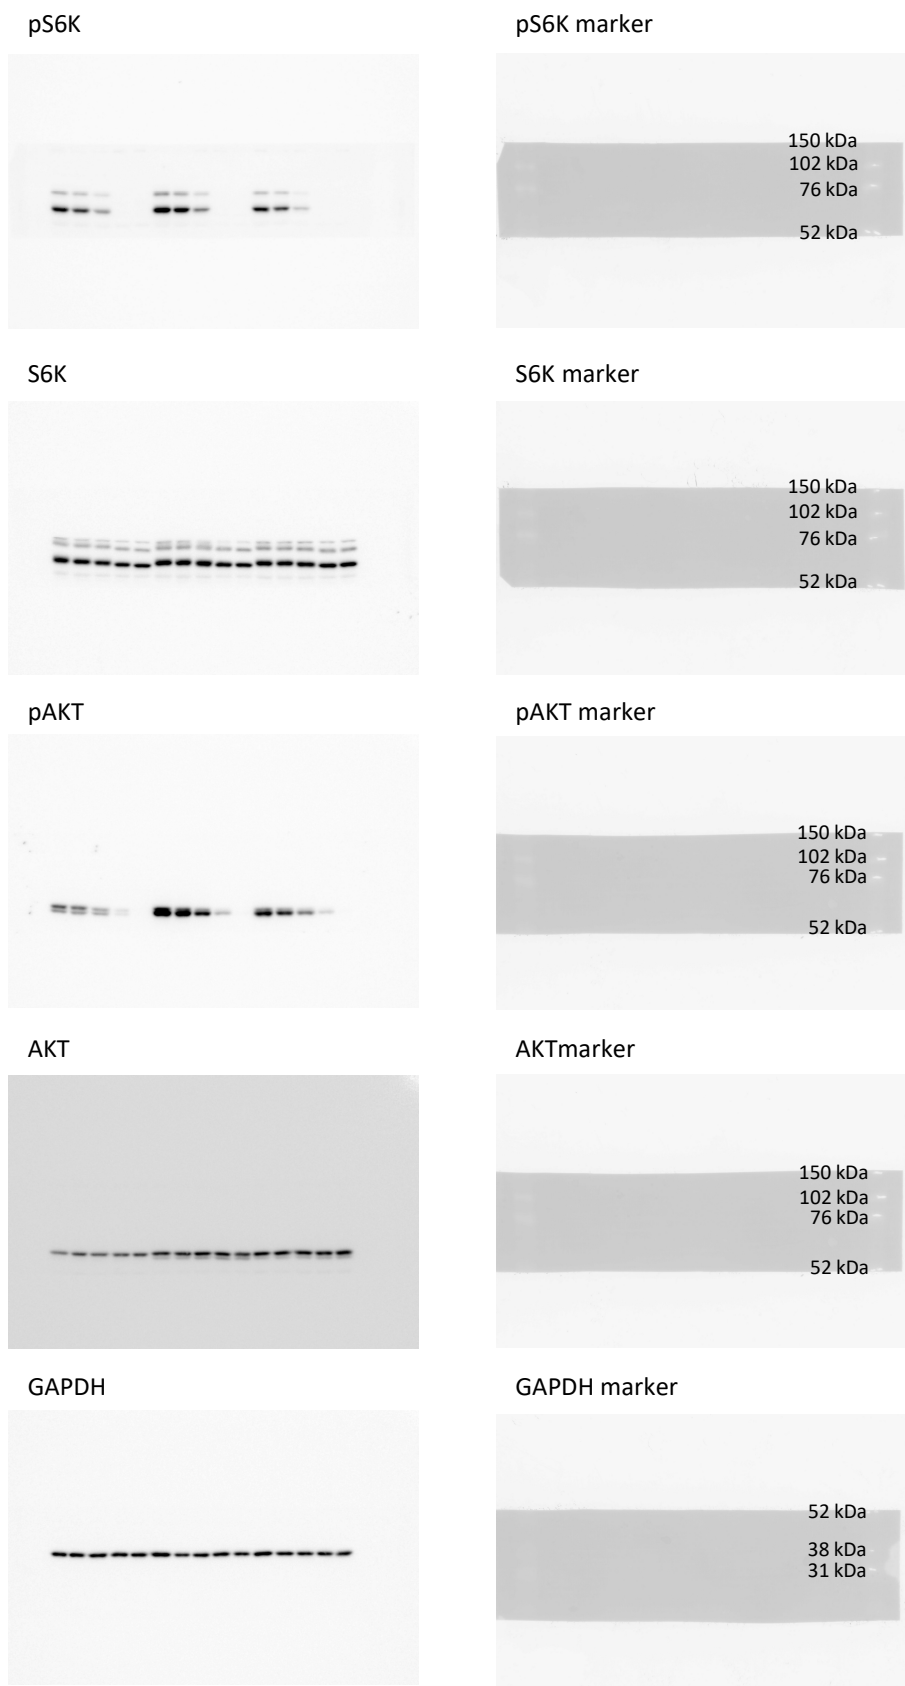

Supplement: 41598_2022_12995_MOESM1_ESM.pdf [file 41598_2022_12995_MOESM1_ESM.pdf]
